# Supplementary material for: Platinum-catalysed diborylation of arynes: synthesis and reaction of 1,2-diborylarenes
Source: Royal Society of Chemistry journal article supplement (doi:10.1039/b919407j), 2010-01-01
Supplement: b919407j.pdf [file b919407j.pdf]

*Supplementary Information for*

**Platinum-catalysed diborylation of arynes: synthesis and reaction of  
1,2-diborylarenes**

*Hiroto Yoshida,\* Kengo Okada, Shota Kawashima, Kenji Tanino and Joji Ohshita*

Department of Applied Chemistry, Graduate School of Engineering, Hiroshima University,  
Higashi-Hiroshima 739-8527, Japan

**Contents**

|                                                                      |            |
|----------------------------------------------------------------------|------------|
| <b>General Remarks</b>                                               | <b>S2</b>  |
| <b>Aryne Precursors</b>                                              | <b>S2</b>  |
| <b>Experimental Procedures and Characterization Data of Products</b> | <b>S3</b>  |
| <b>References</b>                                                    | <b>S16</b> |
| <b><sup>1</sup>H and <sup>13</sup>C NMR Spectra of New Compounds</b> | <b>S17</b> |

**General remarks.**

All manipulations of oxygen- and moisture-sensitive materials were conducted with a standard Schlenk technique under a purified argon atmosphere. Nuclear magnetic resonance spectra were taken on a JEOL EX-270 ( $^1\text{H}$ , 270 MHz;  $^{13}\text{C}$ , 67.8 MHz) spectrometer or a JEOL Lambda-400 ( $^1\text{H}$ , 400 MHz;  $^{13}\text{C}$ , 99.5 MHz) spectrometer using residual chloroform ( $^1\text{H}$ ,  $\delta = 7.25$ ), benzene ( $^1\text{H}$ ,  $\delta = 7.15$ ),  $\text{CDCl}_3$  ( $^{13}\text{C}$ ,  $\delta = 77.0$ ) or  $\text{C}_6\text{D}_6$  ( $^{13}\text{C}$ ,  $\delta = 128.0$ ) as an internal standard.  $^1\text{H}$  NMR data are reported as follows: chemical shift, multiplicity (s = singlet, d = doublet, t = triplet, br = broad, m = multiplet), coupling constants (Hz), integration. High-resolution mass spectra were obtained with a JEOL JMS-SX102A spectrometer. Melting points were measured with Yanaco Micro Melting Point apparatus and uncorrected. Preparative recycling gel permeation chromatography was performed with GL Science PU 614 equipped with Shodex GPC H-2001L and -2002L columns (chloroform or toluene as an eluent). Unless otherwise noted, commercially available reagents were used without purification. 18-Crown-6 was recrystallized from distilled MeCN. KF (spray-dried) was vacuum dried at 100 °C for 12 h. DME was distilled from sodium/benzophenone ketyl. MeCN was distilled from phosphorus pentoxide.

**Aryne precursors.**

2-(Trimethylsilyl)phenyl triflate (**1a**),<sup>1</sup> 4-methoxy-2-(trimethylsilyl)phenyl triflate (**1b**),<sup>2</sup> 4-methyl-2-(trimethylsilyl)phenyl triflate (**1c**),<sup>3</sup> 4-fluoro-2-(trimethylsilyl)phenyl triflate (**1d**),<sup>4</sup> 4-phenyl-2-(trimethylsilyl)phenyl triflate (**1e**),<sup>2</sup> 6-methyl-2-(trimethylsilyl)phenyl triflate (**1f**),<sup>2</sup> 3,4-dimethoxy-2-(trimethylsilyl)phenyl triflate (**1g**),<sup>2</sup> 4,5-dimethyl-2-(trimethylsilyl)phenyl triflate (**1h**),<sup>5</sup> 3,6-dimethoxy-2-(trimethylsilyl)phenyl triflate (**1i**)<sup>5</sup> and 3,6-dimethyl-2-(trimethylsilyl)phenyl triflate (**1j**)<sup>4</sup> were prepared according to literature procedures.

**Diborylation of arynes: a general procedure.**

A DME solution (2 mL) of Pt(dba)<sub>2</sub> (2.0 mg, 3.0 μmol) and 1-adamantyl isocyanide (2.4 mg, 0.015 mmol) was stirred at room temperature for 0.5 h. To this solution were added 18-Crown-6 (0.032 g, 0.12 mmol), bis(pinacolato)diboron (0.021 g, 0.084 mmol), an aryne precursor (0.060 mmol) and KF (7.0 mg, 0.12 mmol), and the resulting mixture was stirred at 80 °C for the period as specified in Tables 1 and 2. The mixture was diluted with ethyl acetate and washed with cold brine. The organic layer was dried over MgSO<sub>4</sub> and concentrated in vacuo. Preparative recycling gel permeation chromatography (chloroform as an eluent) gave the corresponding product.

In <sup>13</sup>C NMR spectra, boron-bound carbons were not detected because of quadrupolar relaxation.

**1,2-Bis(4,4,5,5-tetramethyl-1,3,2-dioxaborolan-2-yl)benzene (2a)**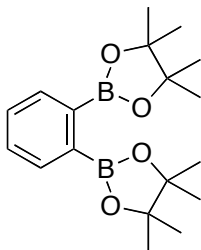

Isolated in 77% yield as a white solid: mp 108–111 °C; <sup>1</sup>H NMR (CDCl<sub>3</sub>) δ 1.35 (s, 24 H), 7.32–7.40 (m, 2 H), 7.59–7.67 (m, 2 H); <sup>13</sup>C NMR (CDCl<sub>3</sub>) δ 24.9, 83.9, 129.1, 133.4; HRMS Calcd for C<sub>18</sub>H<sub>28</sub>B<sub>2</sub>O<sub>4</sub>: M<sup>+</sup>, 330.2174. Found: *m/z* 330.2176.

**1,2-Bis(4,4,5,5-tetramethyl-1,3,2-dioxaborolan-2-yl)-4-methoxybenzene (2b)**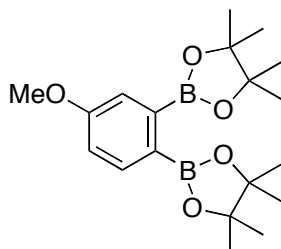

Isolated in 78% yield as a colorless oil: <sup>1</sup>H NMR (CDCl<sub>3</sub>) δ 1.33 (s, 12 H), 1.36 (s, 12 H), 3.81 (s, 3 H), 6.88 (dd, *J* = 8.2, 2.6 Hz, 1 H), 7.09 (d, *J* = 2.6 Hz, 1 H), 7.65 (d, *J* = 8.2 Hz, 1 H); <sup>13</sup>C NMR (CDCl<sub>3</sub>) δ 24.8, 24.9, 55.0, 83.6, 83.9, 114.5, 118.1, 136.0, 160.5; HRMS Calcd for C<sub>19</sub>H<sub>30</sub>B<sub>2</sub>O<sub>5</sub>: M<sup>+</sup>, 360.2279. Found: *m/z* 360.2290.

**1,2-Bis(4,4,5,5-tetramethyl-1,3,2-dioxaborolan-2-yl)-4-methylbenzene (2c)**

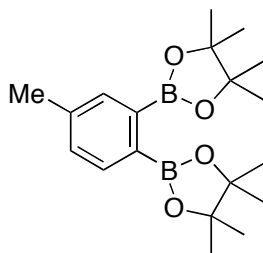

Isolated in 73% yield as a pale yellow solid: mp 69–73 °C;  $^1\text{H}$  NMR ( $\text{CDCl}_3$ )  $\delta$  1.34 (s, 12 H), 1.36 (s, 12 H), 2.31 (s, 3 H), 7.17 (d,  $J = 7.3$  Hz, 1 H), 7.43 (s, 1 H), 7.55 (d,  $J = 7.3$  Hz, 1 H);  $^{13}\text{C}$  NMR ( $\text{CDCl}_3$ )  $\delta$  21.5, 24.9, 83.7, 83.8, 129.8, 133.8, 134.0, 139.0; HRMS Calcd for  $\text{C}_{19}\text{H}_{30}\text{B}_2\text{O}_4$ :  $\text{M}^+$ , 344.2330. Found:  $m/z$  344.2330.

**1,2-Bis(4,4,5,5-tetramethyl-1,3,2-dioxaborolan-2-yl)-4-fluorobenzene (2d)**

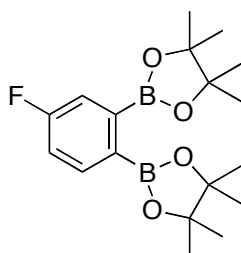

Isolated in 73% yield as a pale yellow oil:  $^1\text{H}$  NMR ( $\text{CDCl}_3$ )  $\delta$  1.34 (s, 12 H), 1.36 (s, 12 H), 7.04 (td,  $J = 8.6, 2.6$  Hz, 1 H), 7.28 (dd,  $J = 9.6, 2.6$  Hz, 1 H), 7.66 (dd,  $J = 8.2, 5.9$  Hz, 1 H);  $^{13}\text{C}$  NMR ( $\text{CDCl}_3$ )  $\delta$  24.9, 84.0, 84.1, 115.9 (d,  $J_{\text{C-F}} = 19.7$  Hz), 119.8 (d,  $J_{\text{C-F}} = 18.8$  Hz), 136.1 (d,  $J_{\text{C-F}} = 7.4$  Hz), 163.7 (d,  $J_{\text{C-F}} = 250.0$  Hz); HRMS Calcd for  $\text{C}_{18}\text{H}_{27}\text{B}_2\text{FO}_4$ :  $\text{M}^+$ , 348.2079. Found:  $m/z$  348.2083.

**1,2-Bis(4,4,5,5-tetramethyl-1,3,2-dioxaborolan-2-yl)-4-phenylbenzene (2e)**

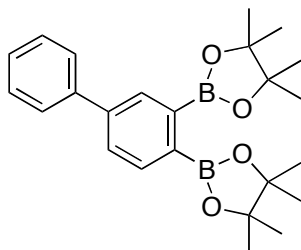

Isolated in 67% yield as a pale yellow solid: mp 122–125 °C;  $^1\text{H}$  NMR ( $\text{CDCl}_3$ )  $\delta$  1.37 (s, 12 H), 1.38 (s, 12 H), 7.29–7.45 (m, 3 H), 7.58–7.63 (m, 3 H), 7.73 (d,  $J = 7.9$  Hz, 1 H), 7.85 (d,  $J = 2.0$  Hz, 1 H);  $^{13}\text{C}$  NMR ( $\text{CDCl}_3$ )  $\delta$  24.9, 83.8, 83.9, 127.21, 127.24, 127.7, 128.6, 132.1, 134.2, 141.1, 141.7; HRMS Calcd for  $\text{C}_{24}\text{H}_{32}\text{B}_2\text{O}_4$ :  $\text{M}^+$ , 406.2487. Found:  $m/z$  406.2489.

**1,2-Bis(4,4,5,5-tetramethyl-1,3,2-dioxaborolan-2-yl)-3-methylbenzene (2f)**

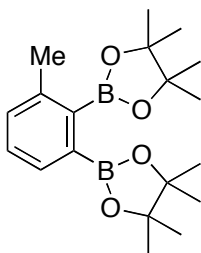

Isolated in 84% yield as a pale yellow solid: mp 57–58 °C;  $^1\text{H}$  NMR ( $\text{CDCl}_3$ )  $\delta$  1.35 (s, 12 H), 1.45 (s, 12 H), 2.43 (s, 3 H), 7.18–7.29 (m, 2 H), 7.64 (dd,  $J = 6.3, 2.3$  Hz, 1 H);  $^{13}\text{C}$  NMR ( $\text{CDCl}_3$ )  $\delta$  21.9, 24.8, 25.4, 83.8, 128.0, 131.6, 132.2, 140.3; HRMS Calcd for  $\text{C}_{19}\text{H}_{30}\text{B}_2\text{O}_4$ :  $\text{M}^+$ , 344.2330. Found:  $m/z$  344.2334.

**1,2-Bis(4,4,5,5-tetramethyl-1,3,2-dioxaborolan-2-yl)-3,4-dimethoxybenzene (2g)**

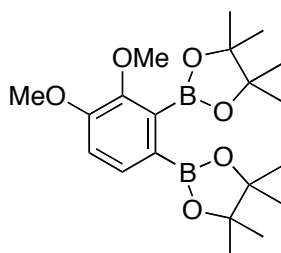

Isolated in 67% yield as a pale yellow solid: mp 111–112 °C;  $^1\text{H}$  NMR ( $\text{CDCl}_3$ )  $\delta$  1.29 (s, 12 H), 1.41 (s, 12 H), 3.80 (s, 3 H), 3.84 (s, 3 H), 6.86 (d,  $J = 7.9$  Hz, 1 H), 7.54 (d,  $J = 7.9$  Hz, 1 H);  $^{13}\text{C}$  NMR ( $\text{CDCl}_3$ )  $\delta$  24.8, 25.1, 55.3, 61.1, 83.7, 83.9, 112.1, 132.8, 151.2, 154.2; HRMS Calcd for  $\text{C}_{20}\text{H}_{32}\text{B}_2\text{O}_6$ :  $\text{M}^+$ , 390.2385. Found:  $m/z$  390.2388.

**1,2-Bis(4,4,5,5-tetramethyl-1,3,2-dioxaborolan-2-yl)-4,5-dimethylbenzene (2h)**

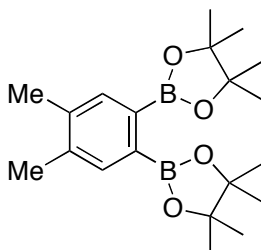

Isolated in 80% yield as a colorless oil:  $^1\text{H}$  NMR ( $\text{CDCl}_3$ )  $\delta$  1.34 (s, 24 H), 2.23 (s, 6 H), 7.41 (s, 2 H);  $^{13}\text{C}$  NMR ( $\text{CDCl}_3$ )  $\delta$  19.6, 24.8, 83.6, 134.9, 137.6; HRMS Calcd for  $\text{C}_{20}\text{H}_{32}\text{B}_2\text{O}_4$ :  $\text{M}^+$ , 358.2487. Found:  $m/z$  358.2490.

**1,2-Bis(4,4,5,5-tetramethyl-1,3,2-dioxaborolan-2-yl)-3,6-dimethoxybenzene (2i)**

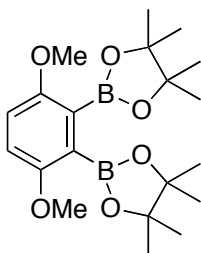

Isolated in 50% yield as a brown solid: mp 128–131 °C;  $^1\text{H}$  NMR ( $\text{CDCl}_3$ )  $\delta$  1.36 (s, 24 H), 3.72 (s, 6 H), 6.82 (s, 2 H);  $^{13}\text{C}$  NMR ( $\text{CDCl}_3$ )  $\delta$  24.9, 57.0, 83.7, 113.9, 157.9; HRMS Calcd for  $\text{C}_{20}\text{H}_{32}\text{B}_2\text{O}_6$ :  $\text{M}^+$ , 390.2385. Found:  $m/z$  390.2391.

**1,2-Bis(4,4,5,5-tetramethyl-1,3,2-dioxaborolan-2-yl)-3,6-dimethylbenzene (2j)**

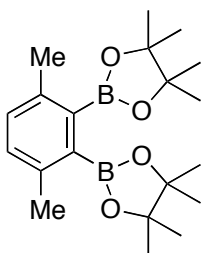

Isolated in 44% yield as a pale yellow solid: mp 136–140 °C;  $^1\text{H}$  NMR ( $\text{CDCl}_3$ )  $\delta$  1.37 (s, 24 H), 2.39 (s, 6 H), 7.01 (s, 2 H);  $^{13}\text{C}$  NMR ( $\text{CDCl}_3$ )  $\delta$  22.0, 25.2, 83.6, 130.8, 139.2; HRMS Calcd for  $\text{C}_{20}\text{H}_{32}\text{B}_2\text{O}_4$ :  $\text{M}^+$ , 358.2487. Found:  $m/z$  358.2484.

**Cross-coupling of 2a for synthesis of symmetrical *ortho*-terphenyls: a general procedure.**

A DME solution (1.4 mL) of **2a** (0.013 g, 0.039 mmol), an aryl halide (0.086 mmol), Cs<sub>2</sub>CO<sub>3</sub> (0.029 g, 0.090 mmol), Pd[P(*t*-Bu)<sub>3</sub>]<sub>2</sub> (1.0 mg, 2.0 μmol) and H<sub>2</sub>O (0.015 mL) was stirred at 80 °C for the period as specified in Table 3. The mixture was diluted with ethyl acetate and washed with brine. The organic layer was dried over MgSO<sub>4</sub> and concentrated in vacuo. Preparative recycling gel permeation chromatography (chloroform or toluene as an eluent) gave the corresponding product.

**1,2-Diphenylbenzene (3a)<sup>6</sup>**

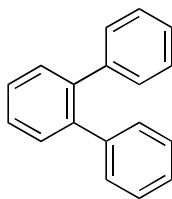

Isolated in 85% yield: <sup>1</sup>H NMR (CDCl<sub>3</sub>) δ 7.12–7.25 (m, 10 H), 7.39–7.46 (m, 4 H); <sup>13</sup>C NMR (CDCl<sub>3</sub>) δ 126.4, 127.5, 127.8, 129.9, 130.6, 140.6, 141.5.

**1,2-Di(4-acetylphenyl)benzene (3b)<sup>7</sup>**

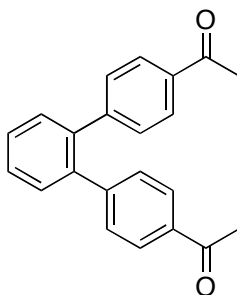

Isolated in 82% yield: <sup>1</sup>H NMR (CDCl<sub>3</sub>) δ 2.57 (s, 6 H), 7.21 (d, *J* = 8.6 Hz, 4 H), 7.42–7.50 (m, 4 H), 7.81 (d, *J* = 8.6 Hz, 4 H); <sup>13</sup>C NMR (CDCl<sub>3</sub>) δ 26.6, 128.2, 128.3, 130.0, 130.6, 135.4, 139.5, 146.0, 197.8.

**1,2-Di(4-nitrophenyl)benzene (3c)<sup>8</sup>**

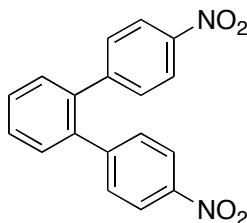

Isolated in 72% yield:  $^1\text{H}$  NMR ( $\text{CDCl}_3$ )  $\delta$  7.28 (d,  $J = 8.9$  Hz, 4 H), 7.43–7.57 (m, 4 H), 8.10 (d,  $J = 8.9$  Hz, 4 H);  $^{13}\text{C}$  NMR ( $\text{CDCl}_3$ )  $\delta$  123.5, 129.1, 130.59, 130.64, 138.3, 146.8, 147.4.

**1,2-Di(4-cyanophenyl)benzene (3d)**

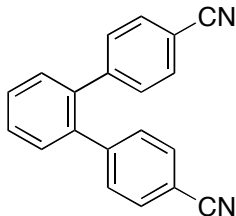

Isolated in 64% yield as a pale yellow solid: mp 184–188 °C;  $^1\text{H}$  NMR ( $\text{CDCl}_3$ )  $\delta$  7.20 (d,  $J = 7.9$  Hz, 4 H), 7.40–7.55 (m, 8 H);  $^{13}\text{C}$  NMR ( $\text{CDCl}_3$ )  $\delta$  110.9, 118.6, 128.9, 130.4, 130.6, 132.0, 138.6, 145.5; HRMS Calcd for  $\text{C}_{20}\text{H}_{12}\text{N}_2$ :  $M^+$ , 280.1000. Found:  $m/z$  280.1007.

**1,2-Di(4-methylphenyl)benzene (3e)<sup>9</sup>**

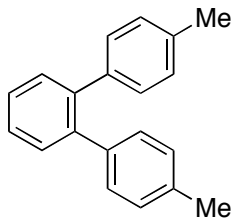

Isolated in 64% yield:  $^1\text{H}$  NMR ( $\text{CDCl}_3$ )  $\delta$  2.32 (s, 6 H), 7.02–7.08 (m, 8 H), 7.37–7.43 (m, 4 H);  $^{13}\text{C}$  NMR ( $\text{CDCl}_3$ )  $\delta$  21.1, 127.2, 128.6, 129.7, 130.6, 135.9, 138.7, 140.4.

**1,2-Di(4-methoxyphenyl)benzene (3f)<sup>9</sup>**

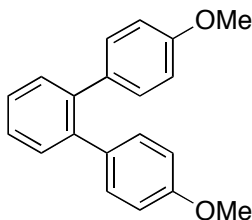

Isolated in 55% yield:  $^1\text{H}$  NMR ( $\text{CDCl}_3$ )  $\delta$  3.78 (s, 6 H), 6.76 (d,  $J = 8.6$  Hz, 4 H), 7.06 (d,  $J = 8.6$  Hz, 4 H), 7.34–7.40 (m, 4 H);  $^{13}\text{C}$  NMR ( $\text{CDCl}_3$ )  $\delta$  55.1, 113.3, 127.1, 130.5, 130.9, 134.1, 140.0, 158.2.

**1,2-Di(3-thienyl)benzene (3g)**

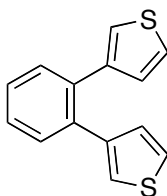

Isolated in 74% yield as a brown oil:  $^1\text{H}$  NMR ( $\text{CDCl}_3$ )  $\delta$  6.79 (dd,  $J = 5.0, 1.0$  Hz, 2 H), 7.06 (dd,  $J = 3.0, 1.0$  Hz, 2 H), 7.17 (dd,  $J = 5.0, 3.0$  Hz, 2 H), 7.32–7.49 (m, 4 H);  $^{13}\text{C}$  NMR ( $\text{CDCl}_3$ )  $\delta$  122.8, 124.6, 127.5, 128.9, 130.2, 135.4, 142.1; HRMS Calcd for  $\text{C}_{14}\text{H}_{10}\text{S}_2$ :  $M^+$ , 242.0224. Found:  $m/z$  242.0222.

**1,2-Di(1-naphthyl)benzene (3h)**  
(A mixture of two conformers)

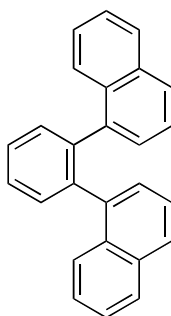

Isolated in 74% yield as a white solid: mp 164–167 °C;  $^1\text{H}$  NMR ( $\text{CDCl}_3$ )  $\delta$  6.87–7.02 (m), 7.05–7.13 (m), 7.18–7.30 (m), 7.40–7.65 (m), 7.72–7.90 (m);  $^{13}\text{C}$  NMR ( $\text{CDCl}_3$ )  $\delta$  124.4, 124.8, 125.19, 125.21, 125.4, 125.7, 126.2, 126.4, 126.8, 126.95, 126.98, 127.1, 127.2, 127.8, 128.1, 128.2, 131.58, 131.64, 131.7, 132.5, 133.2, 133.3, 138.8, 138.9, 140.2, 140.3; HRMS Calcd for  $\text{C}_{26}\text{H}_{18}$ :  $M^+$ , 330.1409. Found:  $m/z$  330.1407.

**Cross-coupling of 2a for synthesis of fluoranthenes: a general procedure.**

A DME solution (1.4 mL) of **2a** (0.013 g, 0.039 mmol), an 1,8-dihalonaphthalene (0.043 mmol),  $\text{Cs}_2\text{CO}_3$  (0.029 g, 0.090 mmol),  $\text{Pd}[\text{P}(t\text{-Bu})_3]_2$  (1.0 mg, 2.0  $\mu\text{mol}$ ) and  $\text{H}_2\text{O}$  (0.015 mL) was stirred at 80 °C for the period as specified in Scheme 2. The mixture was diluted with ethyl acetate and washed with brine. The organic layer was dried over  $\text{MgSO}_4$  and concentrated in vacuo. Preparative recycling gel permeation chromatography (chloroform or toluene as an eluent) gave the corresponding product.

**Fluoranthene (3i)<sup>6</sup>**

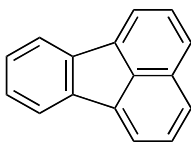

Isolated in 56% yield:  $^1\text{H}$  NMR ( $\text{CDCl}_3$ )  $\delta$  7.29–7.38 (m, 2 H), 7.51–7.63 (m, 2 H), 7.72–7.92 (m, 6 H);  $^{13}\text{C}$  NMR ( $\text{CDCl}_3$ )  $\delta$  120.0, 121.5, 126.6, 127.5, 127.9, 130.0, 132.5, 137.0, 139.4.

### 1,2-Dihydrocyclopenta[cd]fluoranthene (3j)<sup>10</sup>

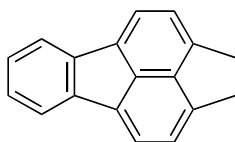

Isolated in 71% yield:  $^1\text{H}$  NMR ( $\text{C}_6\text{D}_6$ )  $\delta$  3.02 (s, 4 H), 7.18–7.24 (m, 2 H), 7.25–7.30 (m, 2 H), 7.74–7.77 (m, 2 H), 7.84–7.88 (m, 2 H);  $^{13}\text{C}$  NMR ( $\text{CDCl}_3$ )  $\delta$  32.4, 120.8, 122.05, 122.07, 126.7, 132.6, 136.7, 140.2, 145.9.

### Synthesis of 2-(4,4,5,5-tetramethyl-1,3,2-dioxaborolan-2-yl)biphenyl.

A DME solution (1.2 mL) of **2a** (0.14 g, 0.42 mmol), iodobenzene (0.086 g, 0.42 mmol), KOH (0.35 g, 0.63 mmol),  $\text{Pd}(\text{PPh}_3)_4$  (0.024 g, 0.021 mmol) and  $\text{H}_2\text{O}$  (0.21 mL) was stirred at 40 °C for 23 h. The mixture was diluted with ethyl acetate and washed with brine. The organic layer was dried over  $\text{MgSO}_4$  and concentrated in vacuo. Preparative recycling gel permeation chromatography (chloroform as an eluent) gave 2-(4,4,5,5-tetramethyl-1,3,2-dioxaborolan-2-yl)biphenyl (0.066 g, 56% yield).

### Cross-coupling for synthesis of unsymmetrical *ortho*-terphenyls: a general procedure.

A DME solution (1.4 mL) of 2-(4,4,5,5-tetramethyl-1,3,2-dioxaborolan-2-yl)biphenyl (0.011 g, 0.039 mmol), an aryl halide (0.043 mmol),  $\text{Cs}_2\text{CO}_3$  (0.015 g, 0.045 mmol),  $\text{Pd}[\text{P}(t\text{-Bu})_3]_2$  (1.0 mg, 2.0  $\mu\text{mol}$ ) and  $\text{H}_2\text{O}$  (7.5  $\mu\text{L}$ ) was stirred at 80 °C for the period as specified in Table 4. The mixture was diluted with ethyl acetate and washed with brine. The organic layer was dried over  $\text{MgSO}_4$  and concentrated in vacuo. Preparative recycling gel permeation chromatography (chloroform or toluene as an eluent) gave the corresponding product.

### 1-(4-Acetylphenyl)-2-phenylbenzene (4a)<sup>11</sup>

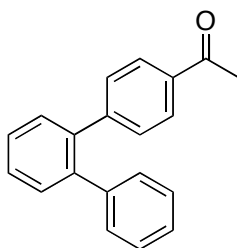

Isolated in 93% yield:  $^1\text{H}$  NMR ( $\text{CDCl}_3$ )  $\delta$  2.57 (s, 3 H), 7.10–7.16 (m, 2 H), 7.19–7.27 (m, 4 H), 7.41–7.48 (m, 5 H), 7.81 (d,  $J$  = 8.6 Hz, 2 H);  $^{13}\text{C}$  NMR ( $\text{CDCl}_3$ )  $\delta$  26.6, 126.7, 127.6, 127.97, 128.04, 128.2, 129.8, 130.1, 130.4, 130.8, 135.1, 139.4, 140.7, 141.0, 146.6, 197.9.

**1-(4-Nitrophenyl)-2-phenylbenzene (4b)**

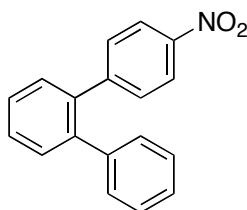

Isolated in 86% yield as a brown solid: mp 81–83 °C;  $^1\text{H}$  NMR ( $\text{CDCl}_3$ )  $\delta$  7.07–7.13 (m, 2 H), 7.20–7.33 (m, 5 H), 7.40–7.50 (m, 4 H), 8.06 (d,  $J$  = 8.9 Hz, 2 H);  $^{13}\text{C}$  NMR ( $\text{CDCl}_3$ )  $\delta$  123.2, 127.0, 127.8, 128.2, 128.6, 128.8, 129.8, 130.3, 130.6, 130.9, 138.2, 140.5, 140.7, 148.5; HRMS Calcd for  $\text{C}_{18}\text{H}_{13}\text{NO}_2$ :  $\text{M}^+$ , 275.0946. Found:  $m/z$  275.0943.

**1-(4-Cyanophenyl)-2-phenylbenzene (4c)**

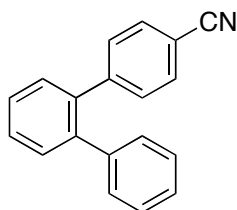

Isolated in 72% yield as a white solid: mp 105–109 °C;  $^1\text{H}$  NMR ( $\text{CDCl}_3$ )  $\delta$  7.04–7.13 (m, 2 H), 7.16–7.31 (m, 5 H), 7.35–7.54 (m, 6 H);  $^{13}\text{C}$  NMR ( $\text{CDCl}_3$ )  $\delta$  110.2, 119.0, 126.9, 127.8, 128.2, 128.6, 129.8, 130.2, 130.5, 130.9, 131.7, 138.6, 140.59, 140.64, 146.4; HRMS Calcd for  $\text{C}_{19}\text{H}_{13}\text{N}$ :  $\text{M}^+$ , 255.1048. Found:  $m/z$  255.1040.

**1-(4-Methylphenyl)-2-phenylbenzene (4d)<sup>12</sup>**

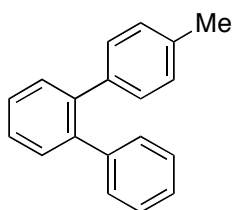

Isolated in 85% yield:  $^1\text{H}$  NMR ( $\text{CDCl}_3$ )  $\delta$  2.31 (s, 3 H), 7.03 (brs, 4 H), 7.13–7.24 (m, 5 H), 7.41 (brs, 4H);  $^{13}\text{C}$  NMR ( $\text{CDCl}_3$ )  $\delta$  21.1, 126.3, 127.2, 127.4, 127.8, 128.6, 129.7, 129.9, 130.6, 136.0, 138.5, 140.5, 141.7.

**1-(4-Methoxyphenyl)-2-phenylbenzene (4e)<sup>11</sup>**

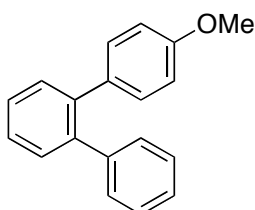

Isolated in 68% yield:  $^1\text{H}$  NMR ( $\text{CDCl}_3$ )  $\delta$  3.77 (s, 3 H), 6.75 (d,  $J$  = 8.9 Hz, 2 H), 7.05 (d,  $J$  = 8.9 Hz, 2 H), 7.12–7.25 (m, 5 H), 7.40 (brs, 4 H);  $^{13}\text{C}$  NMR ( $\text{CDCl}_3$ )  $\delta$  55.1, 113.3, 126.3, 127.1, 127.5, 127.9, 129.8, 130.5, 130.6, 130.9, 133.8, 140.1, 140.4, 141.6, 158.2.

**1-Phenyl-2-(3-thienyl)benzene (4f)**

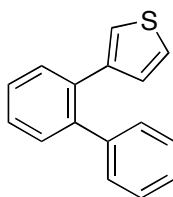

Isolated in 87% yield as a pale yellow solid: mp 62–63 °C;  $^1\text{H}$  NMR ( $\text{CDCl}_3$ )  $\delta$  6.71 (dd,  $J$  = 4.9, 1.3 Hz, 1 H), 6.99 (dd,  $J$  = 3.0, 1.3 Hz, 1 H), 7.11 (dd,  $J$  = 4.9, 3.0 Hz, 1 H), 7.16–7.30 (m, 5 H), 7.36–7.42 (m, 3 H), 7.45–7.52 (m, 1 H);  $^{13}\text{C}$  NMR ( $\text{CDCl}_3$ )  $\delta$  123.0, 124.5, 126.7, 127.4, 127.5, 127.9, 129.1, 129.5, 130.1, 130.6, 135.2, 140.5, 141.6, 141.9; HRMS Calcd for  $\text{C}_{16}\text{H}_{12}\text{S}$ :  $\text{M}^+$ , 236.0660. Found:  $m/z$  236.0662.

**1-(1-Naphthyl)-2-phenylbenzene (4g)**

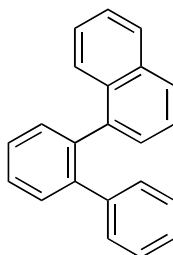

Isolated in 87% yield as a white solid: mp 111–113 °C;  $^1\text{H}$  NMR ( $\text{CDCl}_3$ )  $\delta$  6.95–7.10 (m, 5 H), 7.13–7.57 (m, 8 H), 7.62–7.85 (m, 3 H);  $^{13}\text{C}$  NMR ( $\text{CDCl}_3$ )  $\delta$  125.0, 125.5, 125.7, 126.25, 126.34, 126.9, 127.2, 127.6, 127.8, 128.05, 128.14, 129.1, 130.3, 131.7, 132.2, 133.4, 138.9, 139.3, 141.3, 141.9; HRMS Calcd for  $\text{C}_{22}\text{H}_{16}$ :  $\text{M}^+$ , 280.1252. Found:  $m/z$  280.1248.

**1-(9-Phenanthryl)-2-phenylbenzene (4h)**

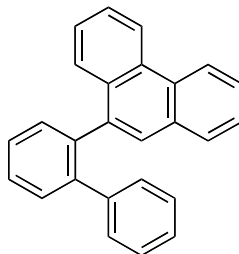

Isolated in 81% yield as a white solid: mp 105–107 °C;  $^1\text{H}$  NMR ( $\text{CDCl}_3$ )  $\delta$  6.95–7.05 (m, 3 H), 7.12–7.20 (m, 2 H), 7.38–7.80 (m, 11 H), 8.67 (d,  $J$  = 8.2 Hz, 2 H);  $^{13}\text{C}$  NMR ( $\text{CDCl}_3$ )  $\delta$  122.4, 122.6, 126.2, 126.3, 126.35, 126.41, 126.6, 127.1, 127.2, 127.7, 127.9, 128.6, 128.7, 129.0, 129.8, 130.2, 130.3, 131.4, 131.5, 131.7, 138.1, 138.9, 141.3, 142.0; HRMS Calcd for  $\text{C}_{26}\text{H}_{18}$ :  $\text{M}^+$ , 330.1409. Found:  $m/z$  330.1401.

**1-(9-Anthryl)-2-phenylbenzene (4i)**

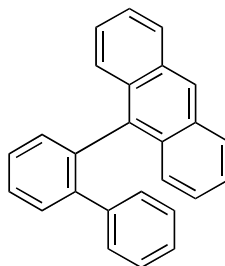

Isolated in 64% yield as a pale yellow solid: mp 120–123 °C;  $^1\text{H}$  NMR ( $\text{CDCl}_3$ )  $\delta$  6.71–7.07 (m, 5 H), 7.22–7.84 (m, 10 H), 7.95 (d,  $J$  = 7.8 Hz, 2 H), 8.38 (s, 1 H);  $^{13}\text{C}$  NMR ( $\text{CDCl}_3$ )  $\delta$  124.9, 125.3, 126.4, 126.5, 126.8, 127.2, 127.3, 128.1, 128.3, 128.4, 130.2, 130.4, 131.1, 132.4, 136.1, 136.9, 141.1, 143.1; HRMS Calcd for  $\text{C}_{26}\text{H}_{18}$ :  $\text{M}^+$ , 330.1409. Found:  $m/z$  330.1402.

**One-batch cross-coupling.**

A DME solution (4 mL) of **2a** (0.026 g, 0.078 mmol), 1-iodonaphthalene (0.021 g, 0.082 mmol),  $\text{Cs}_2\text{CO}_3$  (0.032 g, 0.099 mmol),  $\text{Pd}[\text{P}(t\text{-Bu})_3]_2$  (2.0 mg, 3.9  $\mu\text{mol}$ ) and  $\text{H}_2\text{O}$  (0.020 mL) was stirred at 60 °C for 7 h before addition of 4-iodoacetophenone (0.039 g, 0.16

mmol), Cs<sub>2</sub>CO<sub>3</sub> (0.032 g, 0.099 mmol) and H<sub>2</sub>O (0.020 mL). The resulting mixture was stirred at 80 °C for 24 h, diluted with ethyl acetate and washed with brine. The organic layer was dried over MgSO<sub>4</sub> and concentrated in vacuo. Preparative thin layer chromatography (dichloromethane/hexane as an eluent) followed by preparative recycling gel permeation chromatography (toluene as an eluent) gave **4j**.

#### 1-(4-Acetylphenyl)-2-(1-naphthyl)-benzene (**4j**)

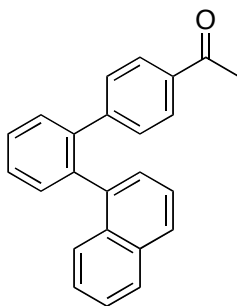

Isolated in 43% yield as a waxy colorless solid: <sup>1</sup>H NMR (CDCl<sub>3</sub>) δ 2.45 (s, 3 H), 7.02–7.21 (m, 3 H), 7.22–7.67 (m, 10 H), 7.68–7.86 (m, 2 H); <sup>13</sup>C NMR (CDCl<sub>3</sub>) δ 26.5, 125.0, 125.6, 126.0, 127.5, 127.65, 127.73, 127.9, 128.1, 128.2, 129.2, 130.1, 131.8, 132.0, 133.4, 134.9, 138.8, 138.9, 140.7, 146.4, 197.8; HRMS Calcd for C<sub>24</sub>H<sub>18</sub>O: M<sup>+</sup>, 322.1358. Found: *m/z* 322.1363.

#### Cross-coupling of **2a** for synthesis of monoborylbiaryls: a general procedure.

A DME solution (4 mL) of **2a** (0.026 g, 0.078 mmol), an aryl halide (0.082 mmol), Cs<sub>2</sub>CO<sub>3</sub> (0.032 g, 0.098 mmol), Pd[P(*t*-Bu)<sub>3</sub>]<sub>2</sub> (2.0 mg, 3.9 μmol) and H<sub>2</sub>O (0.020 mL) was stirred at 60 °C for the period as specified in Scheme 4. The mixture was diluted with ethyl acetate and washed with brine. The organic layer was dried over MgSO<sub>4</sub> and concentrated in vacuo. Preparative thin layer chromatography (hexane/ethyl acetate as an eluent) gave the corresponding product.

#### Methyl 2-(4,4,5,5-tetramethyl-1,3,2-dioxaborolan-2-yl)biphenyl-2'-carboxylate (**5a**)

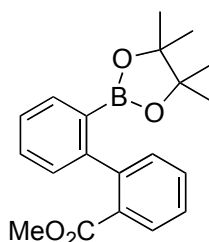

Isolated in 82% yield as a pale yellow waxy solid:  $^1\text{H}$  NMR ( $\text{CDCl}_3$ )  $\delta$  1.07 (s, 12 H), 3.57 (s, 3 H), 7.12–7.56 (m, 6 H), 7.75 (d,  $J = 7.3$  Hz, 1 H), 7.93 (d,  $J = 6.9$  Hz, 1 H);  $^{13}\text{C}$  NMR ( $\text{CDCl}_3$ )  $\delta$  24.5, 51.5, 83.2, 126.1, 126.6, 128.3, 129.4, 129.8, 130.3, 130.7, 131.2, 134.0, 144.8, 147.8, 167.9; HRMS Calcd for  $\text{C}_{20}\text{H}_{23}\text{BO}_4$ :  $\text{M}^+$ , 338.1689. Found:  $m/z$  338.1688.

**9-[2-(4,4,5,5-tetramethyl-1,3,2-dioxaborolan-2-yl)phenyl]phenanthrene (5b)**

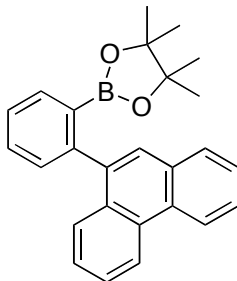

Isolated in 55% yield as an ocher solid: mp 104–106 °C;  $^1\text{H}$  NMR ( $\text{CDCl}_3$ )  $\delta$  0.72 (s, 6 H), 0.87 (s, 6 H), 7.35–7.75 (m, 9 H), 7.80–7.95 (m, 2 H), 8.65–8.85 (m, 2 H);  $^{13}\text{C}$  NMR ( $\text{CDCl}_3$ )  $\delta$  24.1, 24.3, 83.3, 122.38, 122.43, 122.55, 122.60, 126.0, 126.1, 126.3, 126.5, 126.7, 127.1, 128.6, 129.9, 130.1, 130.2, 130.4, 131.6, 132.6, 134.3, 140.1, 145.9; HRMS Calcd for  $\text{C}_{26}\text{H}_{25}\text{BO}_2$ :  $\text{M}^+$ , 380.1948. Found:  $m/z$  380.1951.

**4'-Acetyl-2-(4,4,5,5-tetramethyl-1,3,2-dioxaborolan-2-yl)biphenyl (5c)**

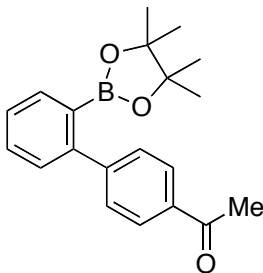

Isolated in 31% yield as a white solid: mp 104–107 °C;  $^1\text{H}$  NMR ( $\text{CDCl}_3$ )  $\delta$  1.20 (s, 12 H), 2.65 (s, 3 H), 7.33–7.42 (m, 2 H), 7.44–7.53 (m, 3 H), 7.77 (d,  $J = 7.6$  Hz, 1 H), 7.98 (d,  $J = 8.6$  Hz, 2 H);  $^{13}\text{C}$  NMR ( $\text{CDCl}_3$ )  $\delta$  24.6, 26.7, 83.9, 127.0, 127.9, 128.9, 129.4, 130.3, 134.9, 135.5, 146.4, 148.1, 198.1; HRMS Calcd for  $\text{C}_{20}\text{H}_{23}\text{BO}_3$ :  $\text{M}^+$ , 322.1740. Found:  $m/z$  322.1737.

## References

- 1 Y. Himeshima, T. Sonoda and H. Kobayashi, *Chem. Lett.*, 1983, 1211.
- 2 H. Yoshida, J. Ikadai, M. Shudo, J. Ohshita and A. Kunai, *J. Am. Chem. Soc.*, 2003, **125**, 6638.
- 3 E. Yoshikawa, K. V. Radhakrishnan and Y. Yamamoto, *J. Am. Chem. Soc.*, 2000, **122**, 7280.
- 4 H. Yoshida, T. Terayama, J. Ohshita and A. Kunai, *Chem. Commun.*, 2004, 1980.
- 5 H. Yoshida, S. Sugiura and A. Kunai, *Org. Lett.*, 2002, **4**, 2767.
- 6 Commercially available.
- 7 F. Vögtle, P. Mayenfels and F. Luppertz, *Synthesis*, 1984, 580.
- 8 N. Tamaoki and T. Yamaoka, *J. Chem. Soc., Perkin Trans. 2*, 1991, 873; J. Garapon and J. K. Stille, *Macromolecules*, 1977, **10**, 627.
- 9 C. –G. Dong and Q. –S. Hu, *J. Am. Chem. Soc.*, 2005, **127**, 10006.
- 10 M. J. Otero-Lobato, L. W. Jenneskens and W. Seinen, *Environ. Mol. Mutagen.*, 2004, **44**, 304.
- 11 J. M. A. Miguez, L. A. Adrio, A. Sousa-Pedrares, J. M. Vila and K. K. Hii, *J. Org. Chem.*, 2007, **72**, 7771.
- 12 C. –H. Cho, I. –S. Kim and K. Park, *Tetrahedron*, 2004, **60**, 4589.

7.6600  
7.6478  
7.6356  
7.6271  
7.6149  
7.6015  
7.5916  
7.5781  
7.5659  
7.5574  
7.5452  
7.5318  
7.5188

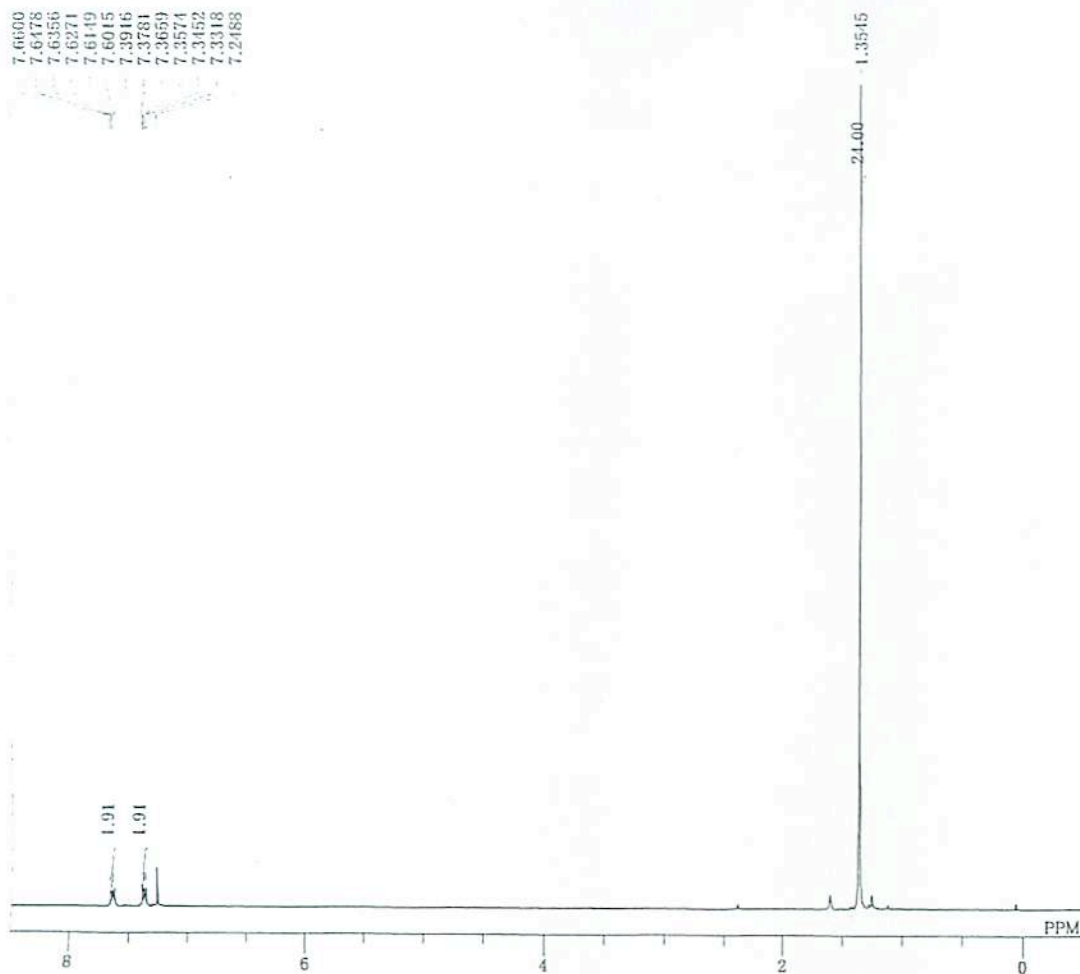

DFILE \_DEFAULT.ALS  
COMNT  
DATIM  
OBNUC 1H  
EXMOD NON  
OBFRQ 270.05 MHz  
OBSET 112.00 KHz  
OBFIN 5800.00 Hz  
POINT 16384  
FREQU 5401.76 Hz  
SCANS 8  
ACQTM 3.0331 sec  
PD 3.9670 sec  
PW1 5.40 usec  
IRNUC 1H  
CTEMP 12.0 c  
SLVNT CDCL3  
EXREF 7.25 ppm  
BF 0.12 Hz  
RGAIN 19

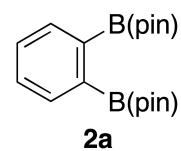

133.4074  
129.1475

83.8505  
77.4770  
77.0000  
76.5312

24.8772

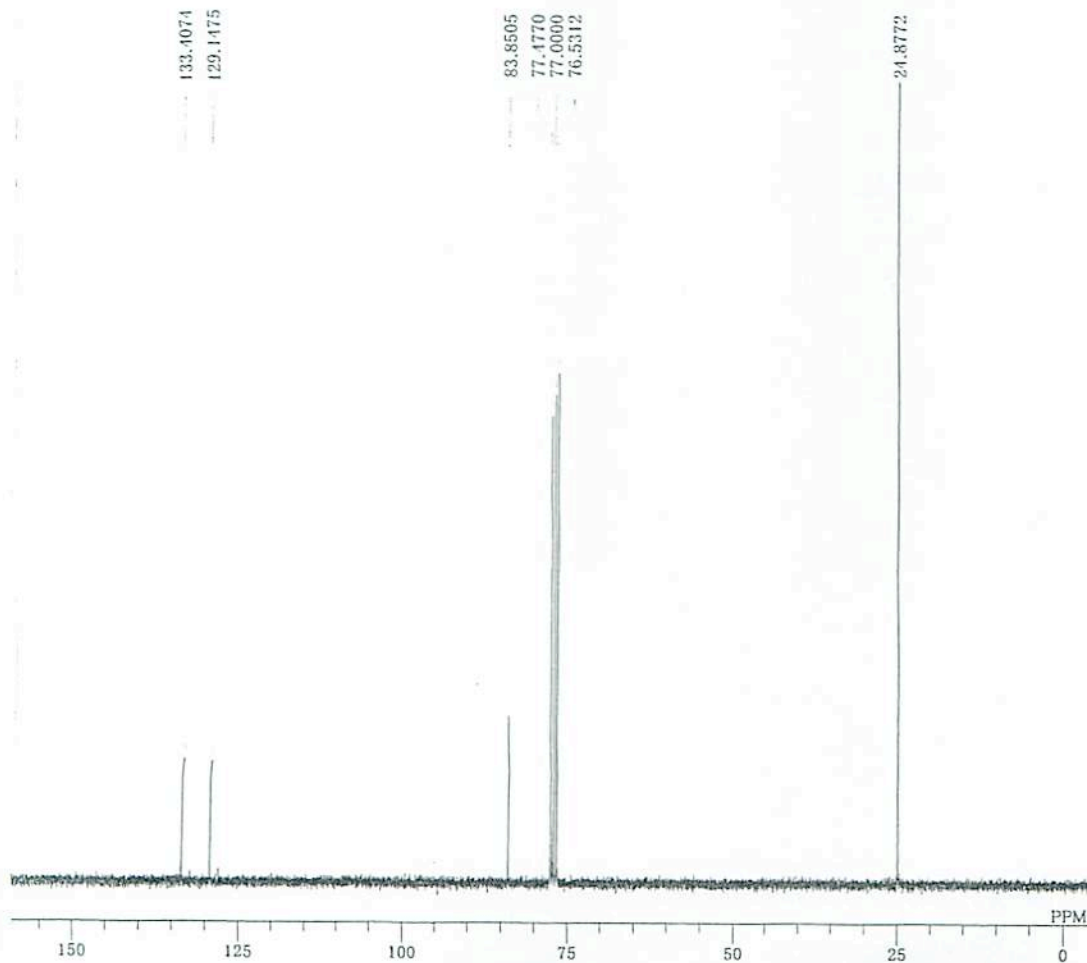

DFILE \_DEFAULT.ALS  
COMNT  
DATIM  
OBNUC 13C  
EXMOD BCM  
OBFRQ 67.80 MHz  
OBSET 135.00 KHz  
OBFIN 5200.00 Hz  
POINT 32768  
FREQU 18306.64 Hz  
SCANS 1570  
ACQTM 1.7900 sec  
PD 1.2100 sec  
PW1 3.50 usec  
IRNUC 1H  
CTEMP 13.0 c  
SLVNT CDCL3  
EXREF 77.00 ppm  
BF 0.12 Hz  
RGAIN 28

7.6622  
7.6324  
7.2504  
7.0975  
7.0877  
6.8998  
6.8901  
6.8695  
6.8595

3.8050

1.3641  
1.3267

COMN1  
DATIM  
OBNUC 1H  
EXMOD NON  
OBFRQ 270.05 MHz  
OBSET 112.00 KHz  
OBFIN 5800.00 Hz  
POINT 16384  
FREQU 5401.76 Hz  
SCANS 8  
ACQTM 3.0331 sec  
PD 3.9670 sec  
PW1 5.40 usec  
IRNUC 1H  
CTEMP 11.2 c  
SLVNT CDCL3  
EXREF 7.25 ppm  
BF 0.12 Hz  
RGAIN 18

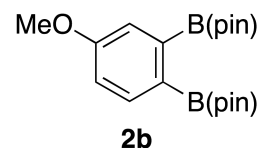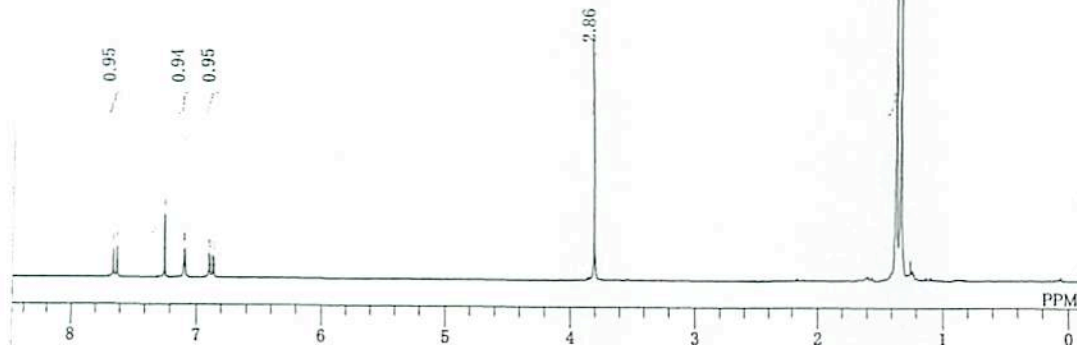

160.4968

136.0226

118.0864  
114.5337

83.8834  
83.6202  
77.4688  
77.0000  
76.5312

55.0259

24.8090  
24.8143

DETAILED  
COMN1  
DATIM  
OBNUC 13C  
EXMOD BCM  
OBFRQ 67.80 MHz  
OBSET 135.00 KHz  
OBFIN 5200.00 Hz  
POINT 32768  
FREQU 18306.64 Hz  
SCANS 1976  
ACQTM 1.7900 sec  
PD 1.2100 sec  
PW1 3.50 usec  
IRNUC 1H  
CTEMP 11.6 c  
SLVNT CDCL3  
EXREF 77.00 ppm  
BF 0.12 Hz  
RGAIN 27

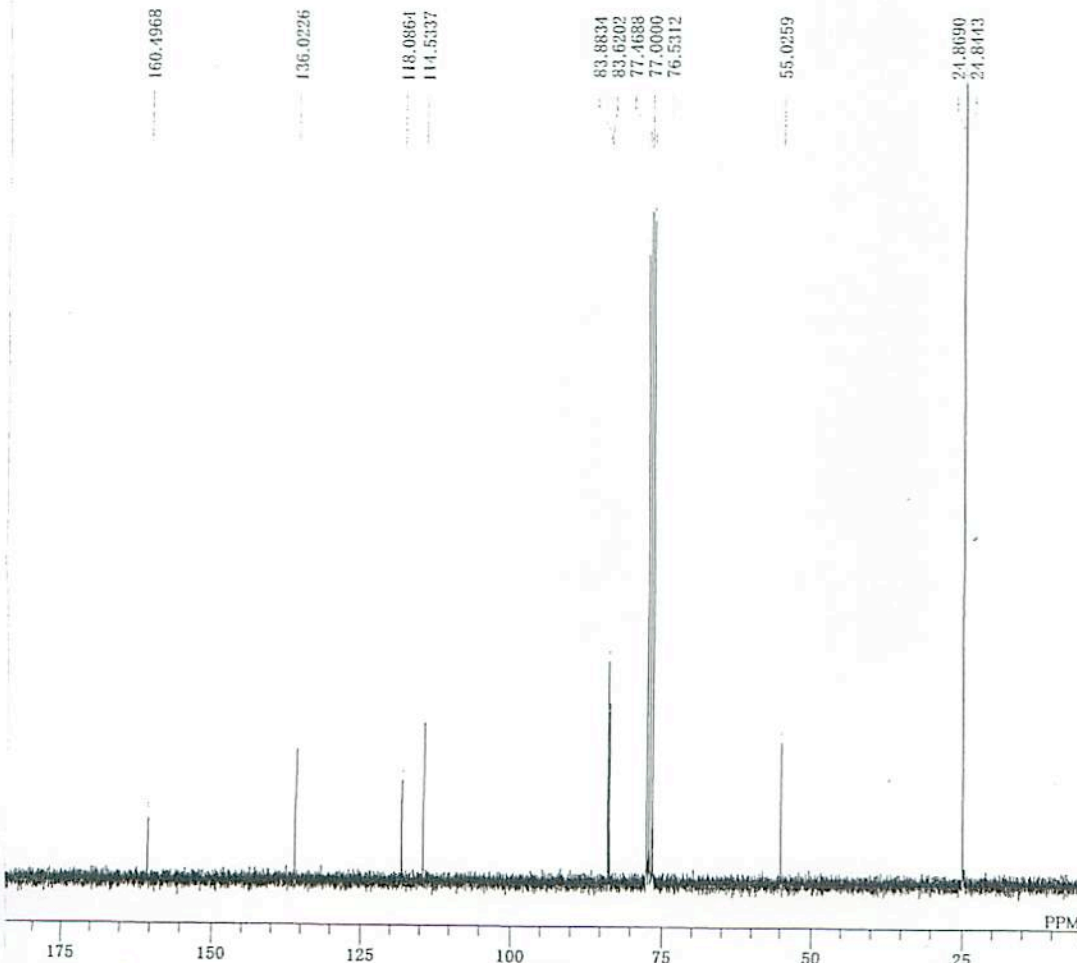

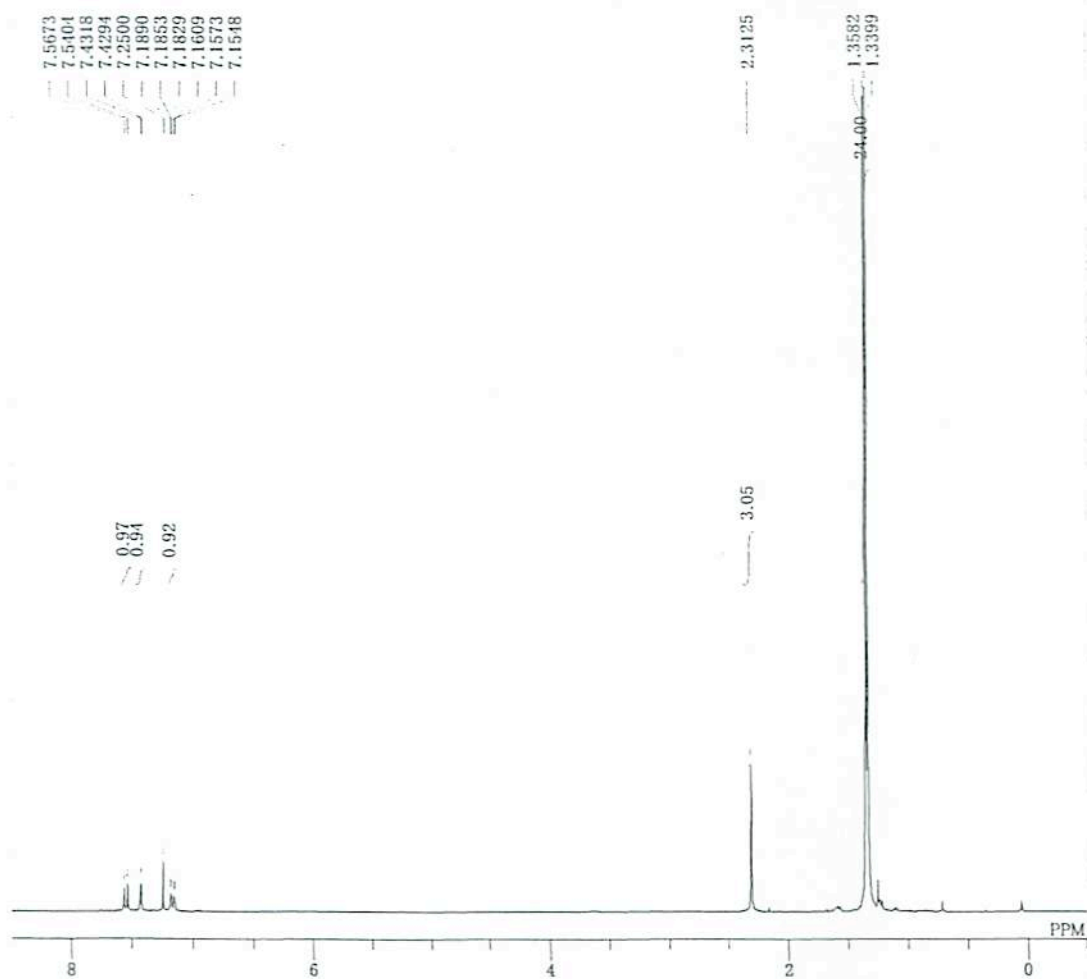

```

DFILE _DEFAULT.ALS
COMNT
DATIM
OBNUC 1H
EXMOD NON
OBFRQ 270.05 MHz
OBSET 112.00 KHz
OBFIN 5800.00 Hz
POINT 16384
FREQU 5401.76 Hz
SCANS 8
ACQTM 3.0331 sec
PD 3.9670 sec
PW1 5.40 usec
IRNUC 1H
CTEMP 13.3 c
SLVNT CDCL3
EXREF 7.25 ppm
BF 0.12 Hz
RGAIN 17

```

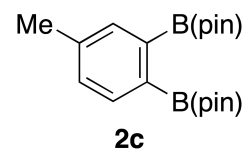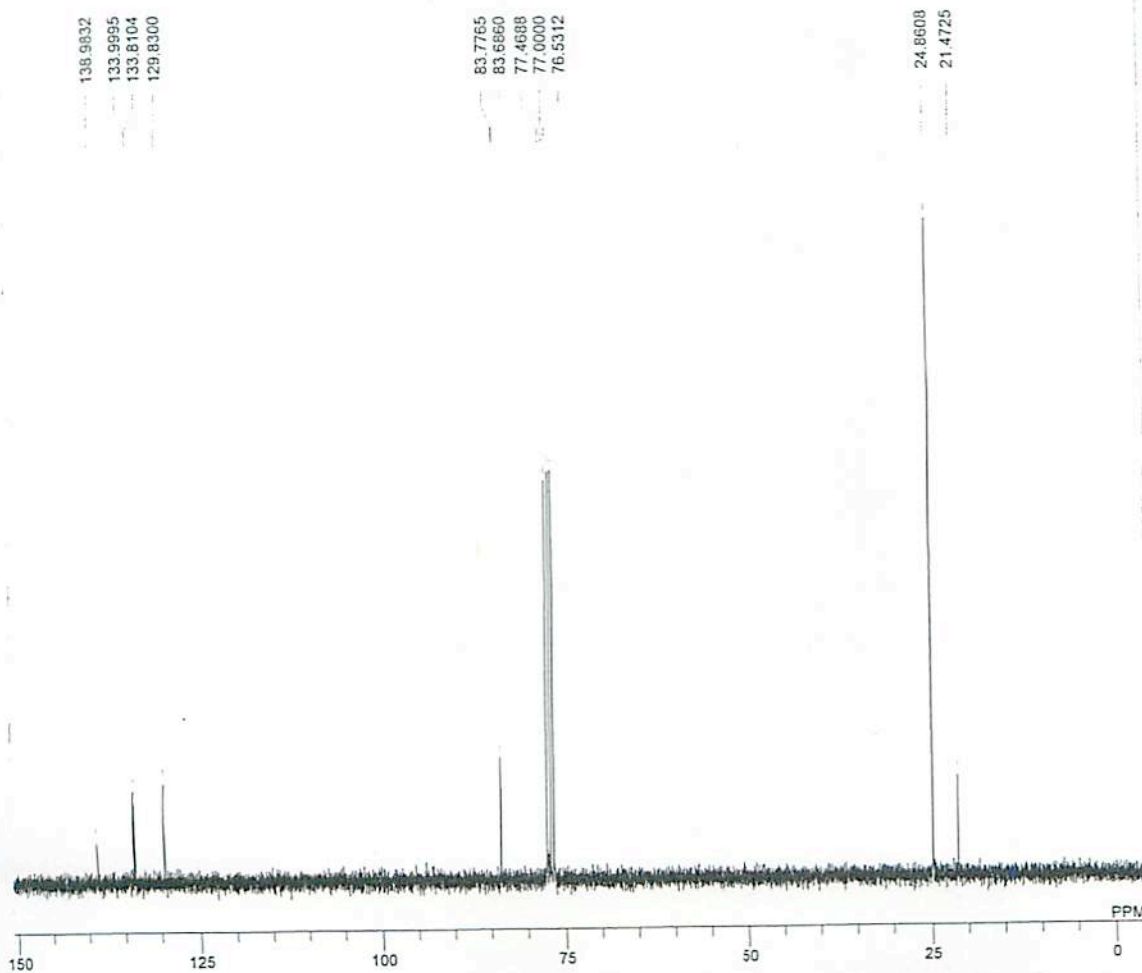

```

DFILE _DEFAULT.ALS
COMNT
DATIM
OBNUC 13C
EXMOD BCM
OBFRQ 67.80 MHz
OBSET 135.00 KHz
OBFIN 5200.00 Hz
POINT 32768
FREQU 18306.64 Hz
SCANS 894
ACQTM 1.7900 sec
PD 1.2100 sec
PW1 3.50 usec
IRNUC 1H
CTEMP 13.4 c
SLVNT CDCL3
EXREF 77.00 ppm
BF 0.12 Hz
RGAIN 27

```

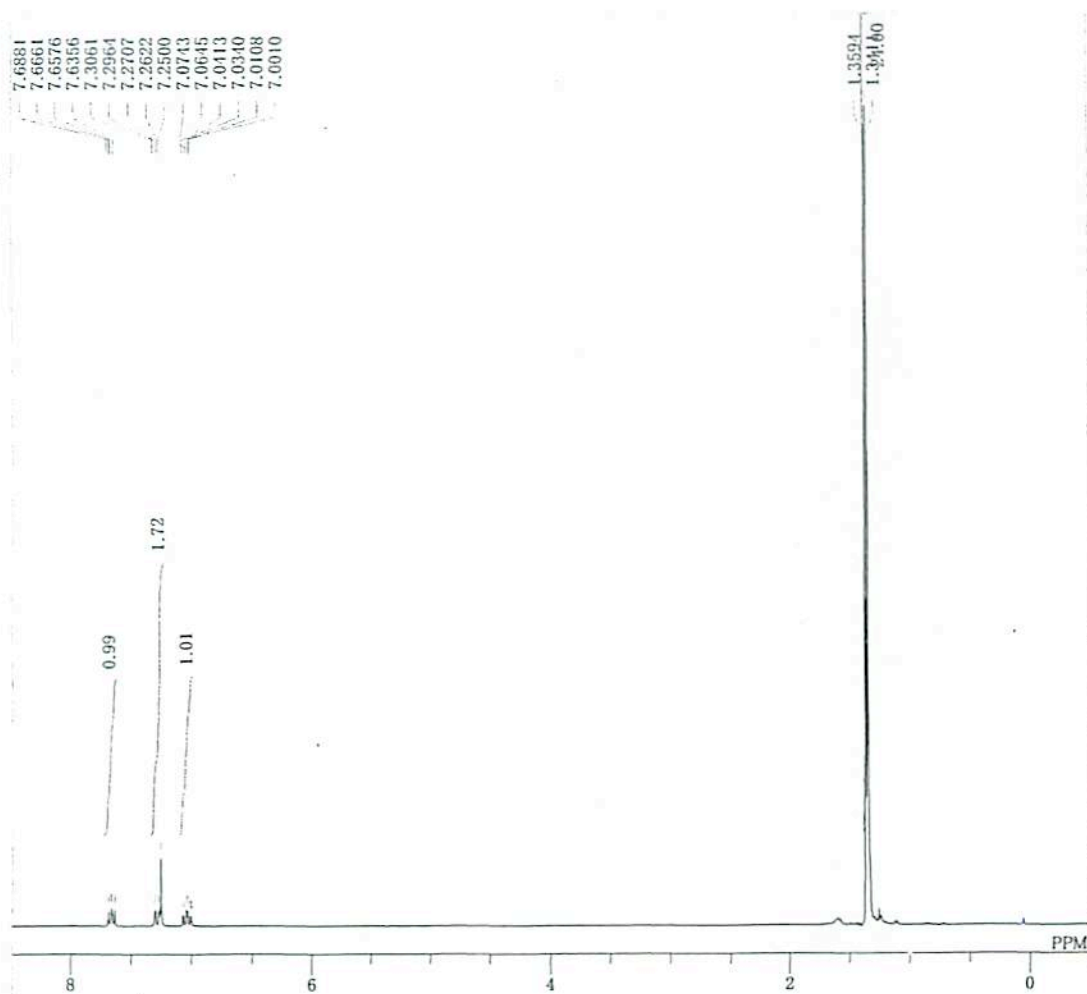

DFILE \_DEFAULT.ALS  
COMNT  
DATIM  
OBNUC  
EXMOD  
OBFRQ 270.05 MHz  
OBSET 112.00 KHz  
OBFIN 5800.00 Hz  
POINT 16384  
FREQU 5401.76 Hz  
SCANS 8  
ACQTM 3.0331 sec  
PD 3.9670 sec  
PW1 5.40 usec  
IRNUC  
CTEMP 11.1 c  
SLVNT CDCL3  
EXREF 7.25 ppm  
BF 0.12 Hz  
RGAIN 18

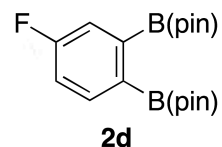

C:\WinLab\data\DATA\Ohtsuka\kawasima\DEFAULT\岡田さん-4F.als

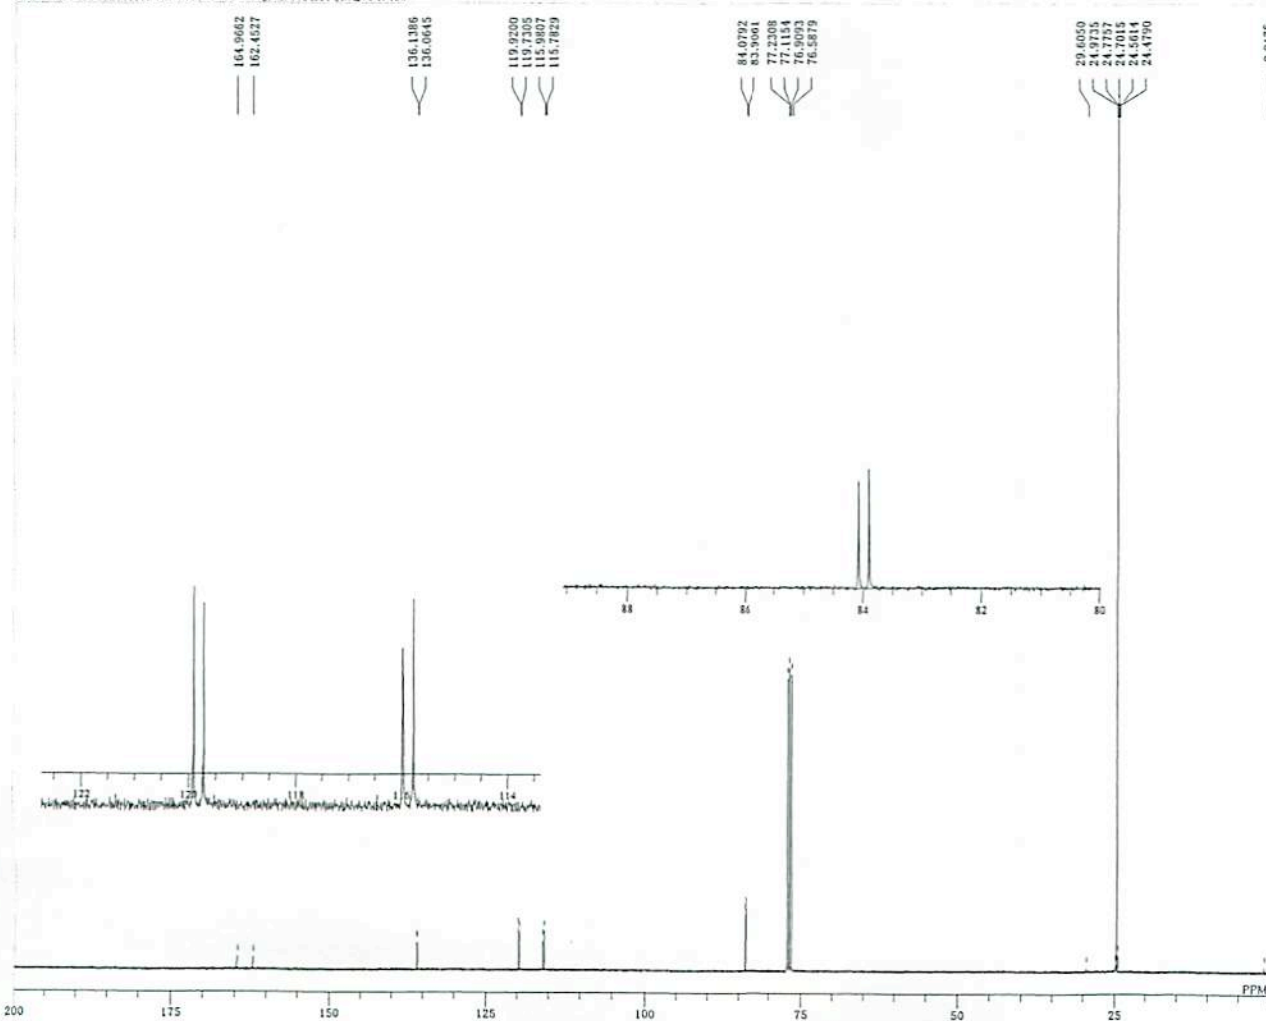

DFILE \_DEFAULT岡田さん-4F.als  
COMNT  
DATIM  
OBNUC  
EXMOD  
OBFRQ 99.45 MHz  
OBSET 0.00 KHz  
OBFIN 104750.00 Hz  
POINT 32768  
FREQU 26881.72 Hz  
SCANS 12342  
ACQTM 1.2190 sec  
PD 1.7810 sec  
PW1 4.25 usec  
IRNUC  
CTEMP 22.3 c  
SLVNT C6D6  
EXREF 77.00 ppm  
BF 0.00 Hz  
RGAIN 27

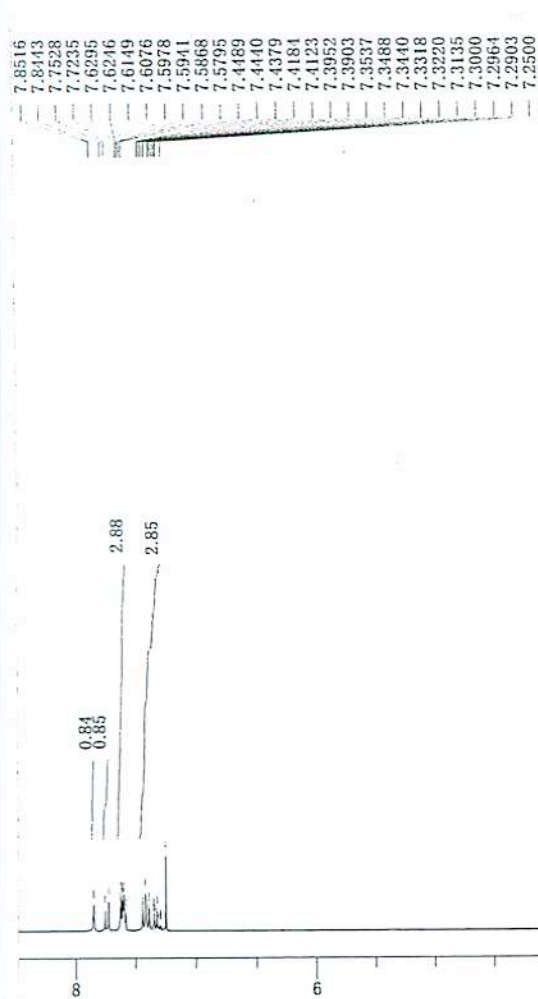

DFILE \_DEFAULT.ALS  
 COMNT  
 DATIM  
 OBNUC  
 EXMOD  
 OBFRQ 270.05 MHz  
 OBSET 112.00 KHz  
 OBFIN 5800.00 Hz  
 POINT 16384  
 FREQU 5401.76 Hz  
 SCANS 8  
 ACQTM 3.0331 sec  
 PD 3.9670 sec  
 PW1 5.40 usec  
 IRNUC  
 CTEMP 10.3 c  
 SLVNT CDCL3  
 EXREF 7.25 ppm  
 BF 0.12 Hz  
 RGAIN 18

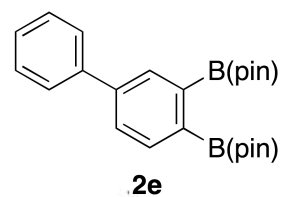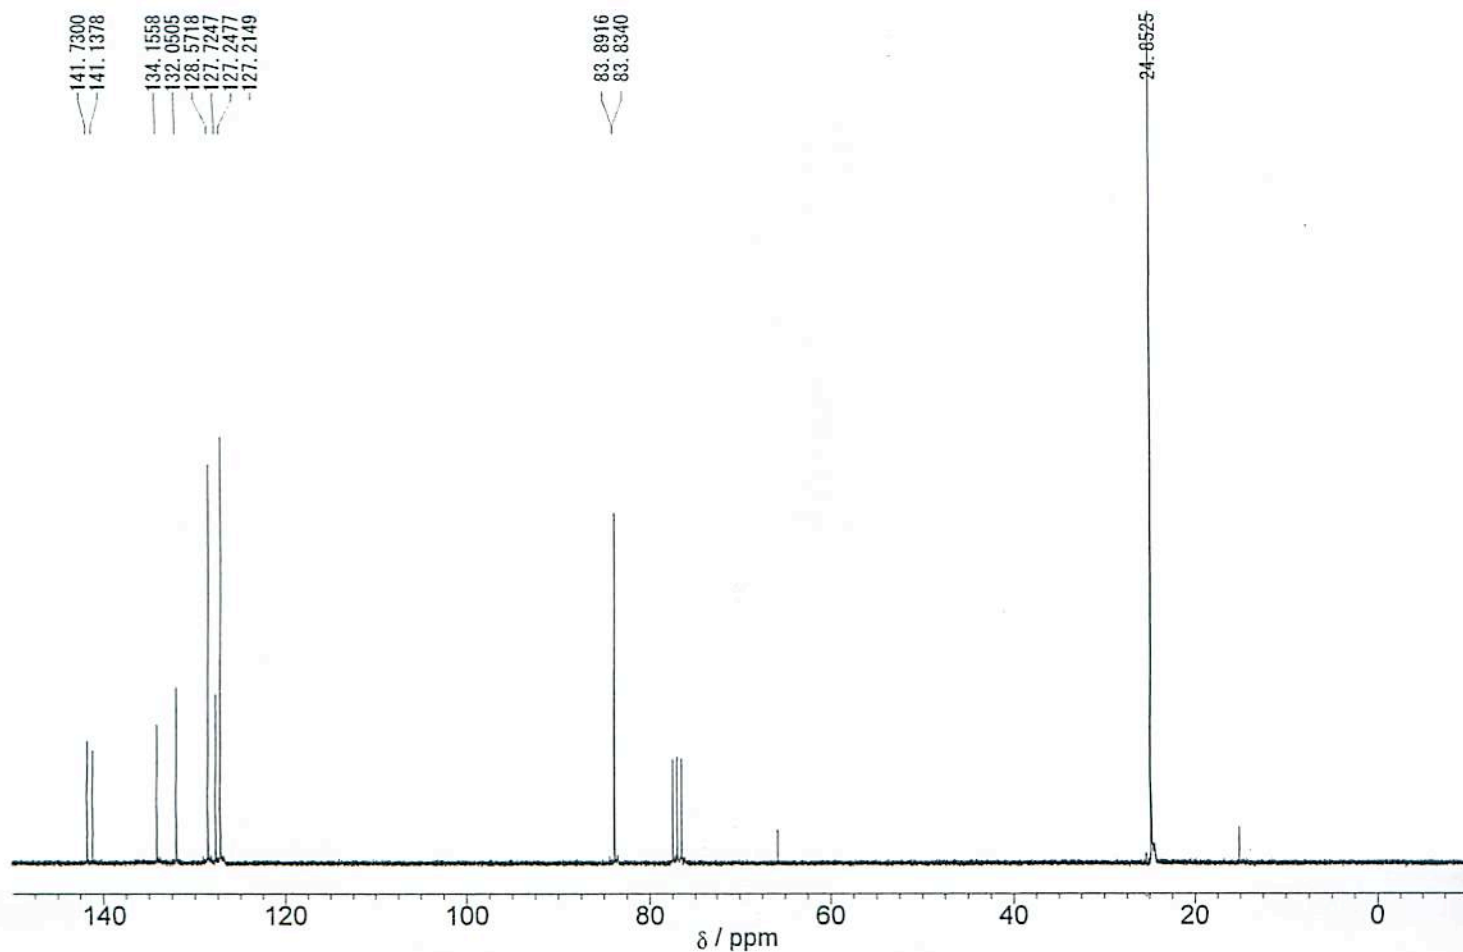

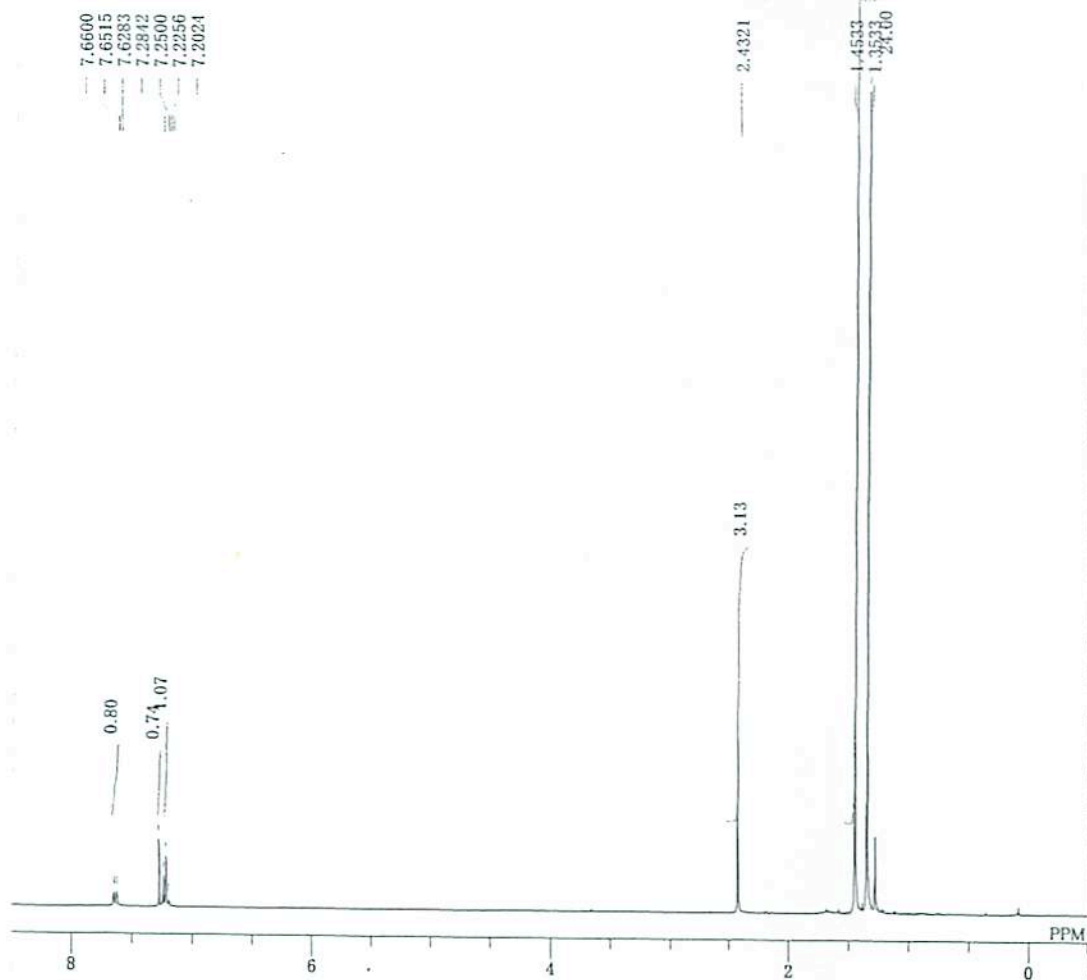

DFILE \_DEFAULT.ALS  
COMNT  
DATIM  
OBNUC 1H  
EXMOD NON  
OBFRQ 270.05 MHz  
OBSET 112.00 KHz  
OBFIN 5800.00 Hz  
POINT 16384  
FREQU 5401.76 Hz  
SCANS 8  
ACQTM 3.0331 sec  
PD 3.9670 sec  
PW1 5.40 usec  
IRNUC 1H  
CTEMP 13.2 c  
SLVNT CDCL3  
EXREF 7.25 ppm  
BF 0.12 Hz  
RGAIN 18

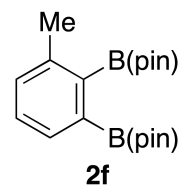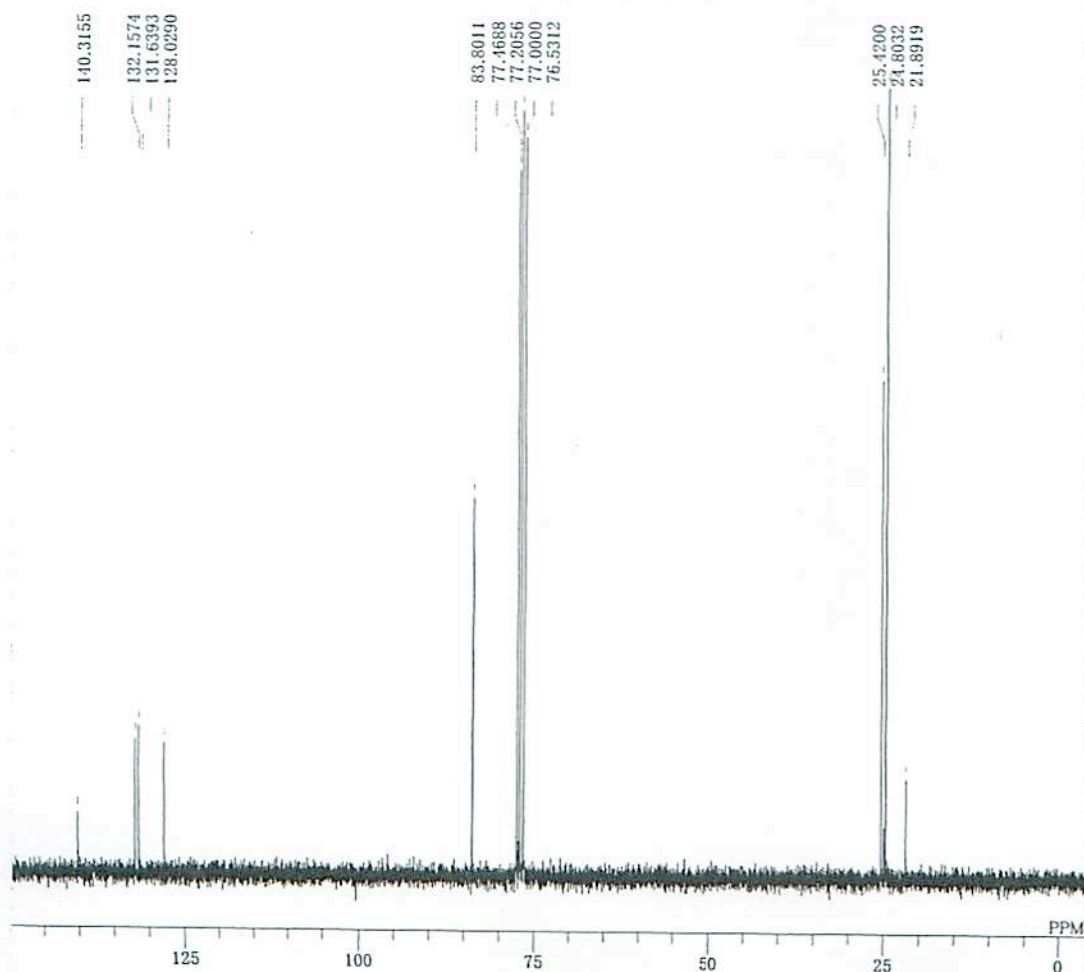

DFILE \_DEFAULT.ALS  
COMNT  
DATIM  
OBNUC 13C  
EXMOD BCM  
OBFRQ 67.80 MHz  
OBSET 135.00 KHz  
OBFIN 5200.00 Hz  
POINT 32768  
FREQU 18306.64 Hz  
SCANS 1027  
ACQTM 1.7900 sec  
PD 1.2100 sec  
PW1 3.50 usec  
IRNUC 1H  
CTEMP 14.0 c  
SLVNT CDCL3  
EXREF 77.00 ppm  
BF 0.12 Hz  
RGAIN 27

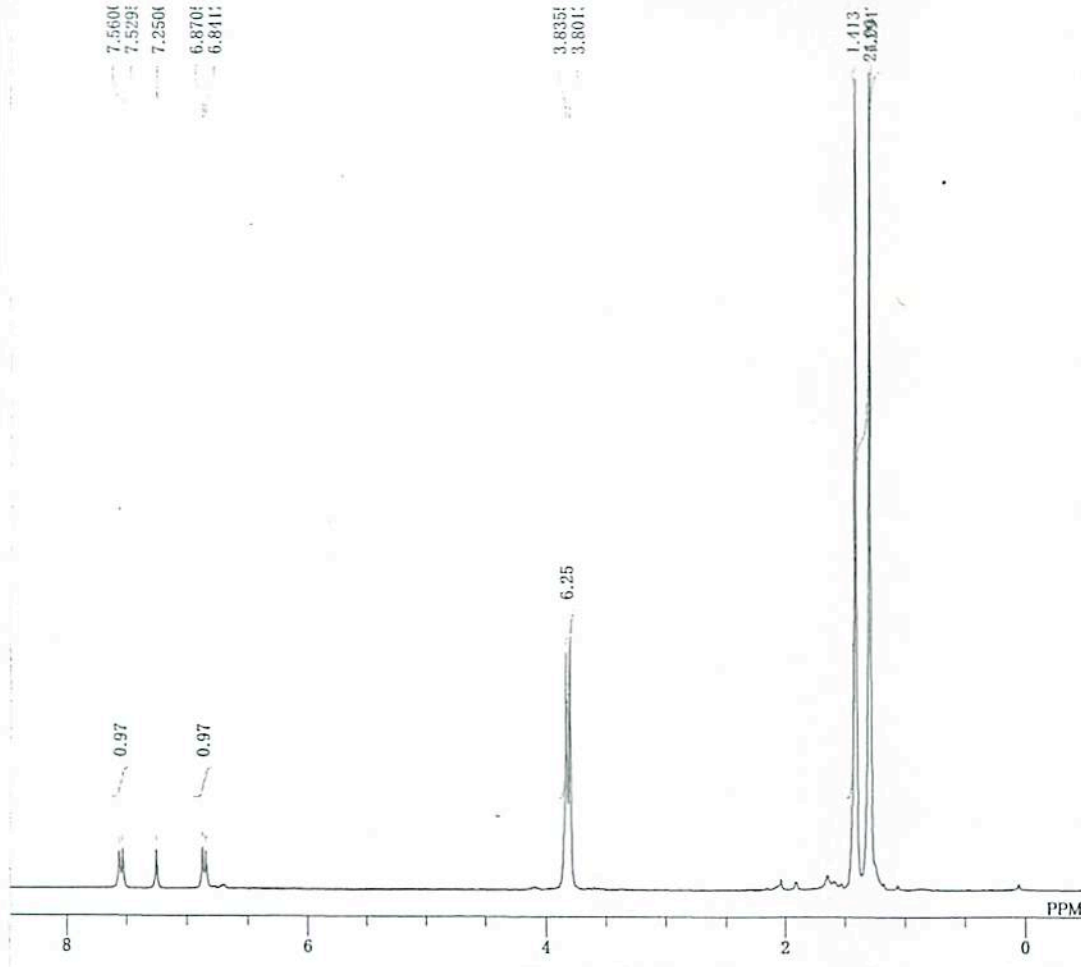

COMPT  
DATIM  
OBNUC  
EXMOD  
OBFRQ  
OBSET  
OBFIN  
POINT  
FREQU  
SCANS  
ACQTM  
PD  
PW1  
IRNUC  
CTEMP  
SLVNT  
EXREF  
BF  
RGAIN

1H  
NON  
270.05 MHz  
112.00 KHz  
5800.00 Hz  
16384  
5401.76 Hz  
8  
3.0331 sec  
3.9670 sec  
5.40 usec  
1H  
12.4 c  
CDCL3  
7.25 ppm  
0.12 Hz  
17

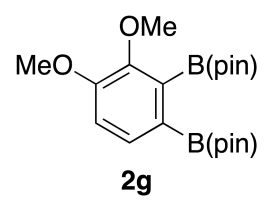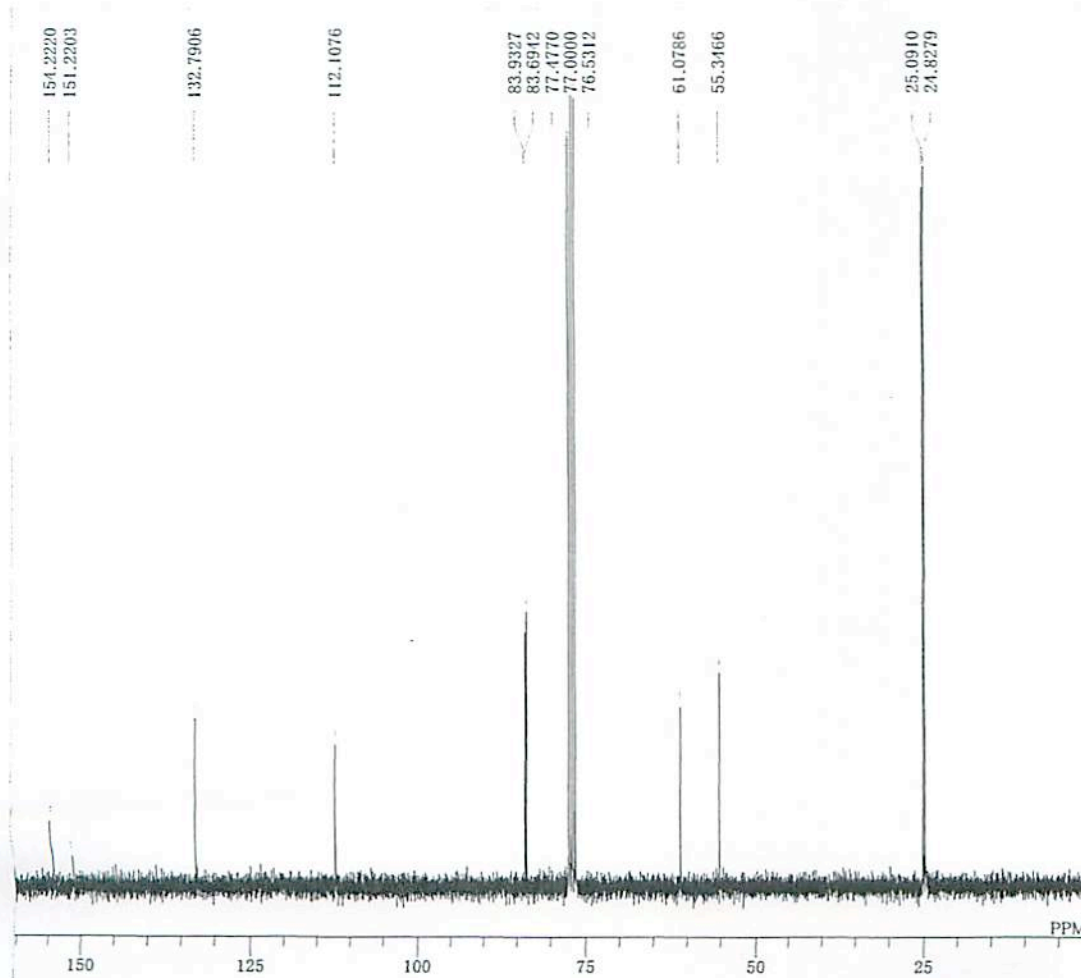

DFILE  
COMNT  
DATIM  
OBNUC  
EXMOD  
OBFRQ  
OBSET  
OBFIN  
POINT  
FREQU  
SCANS  
ACQTM  
PD  
PW1  
IRNUC  
CTEMP  
SLVNT  
EXREF  
BF  
RGAIN

DEFAULT.ALS  
13C  
BCM  
67.80 MHz  
135.00 KHz  
5200.00 Hz  
32768  
18306.64 Hz  
1265  
1.7900 sec  
1.2100 sec  
3.50 usec  
1H  
14.9 c  
CDCL3  
77.00 ppm  
0.12 Hz  
25

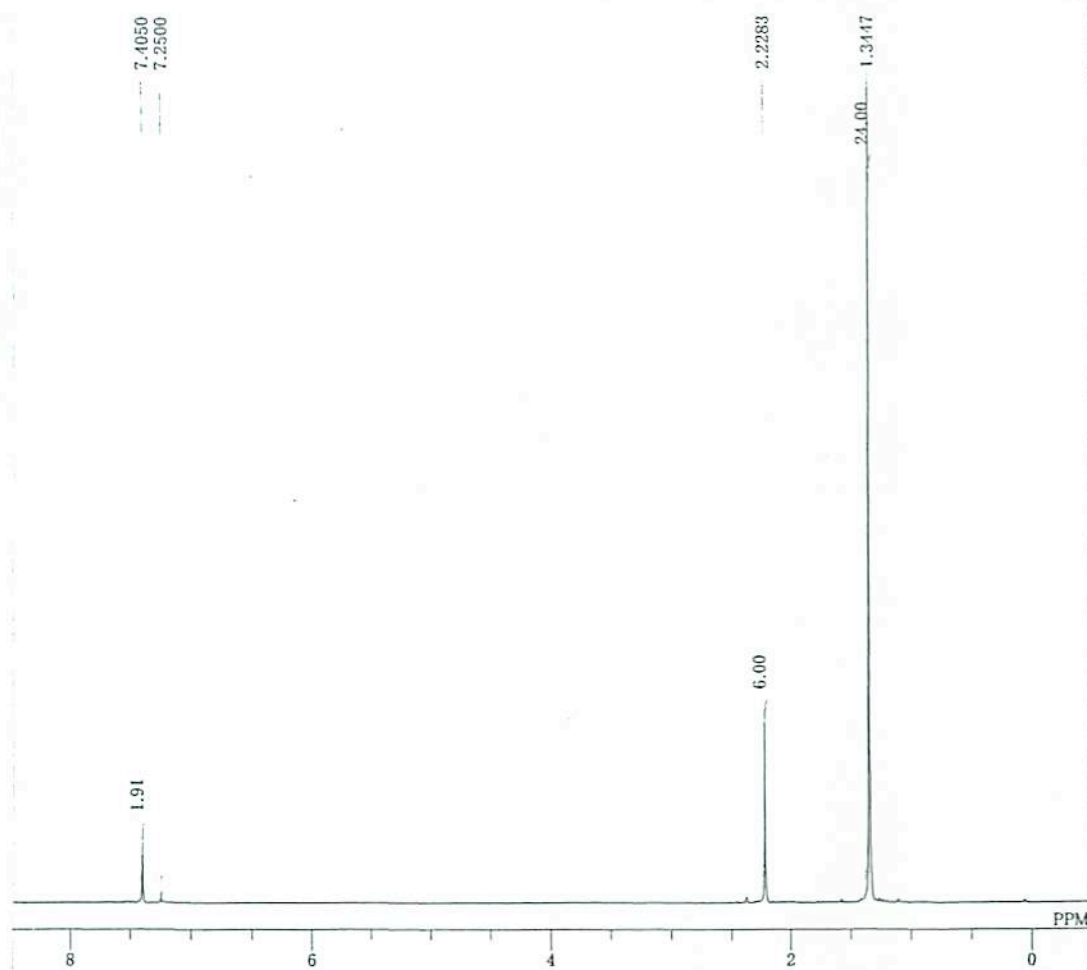

```

DFILE _DEFAULT.ALS
COMNT
DATIM
OBNUC 1H
EXMOD NON
OBFRQ 270.05 MHz
OBSET 112.00 KHz
OBFIN 5800.00 Hz
POINT 16384
FREQU 5401.76 Hz
SCANS 8
ACQTM 3.0331 sec
PD 3.9670 sec
PW1 5.40 usec
IRNUC 1H
CTEMP 10.8 c
SLVNT CDCL3
EXREF 7.25 ppm
BF 0.12 Hz
RGAIN 13
  
```

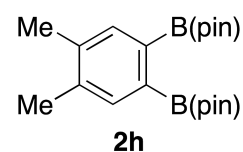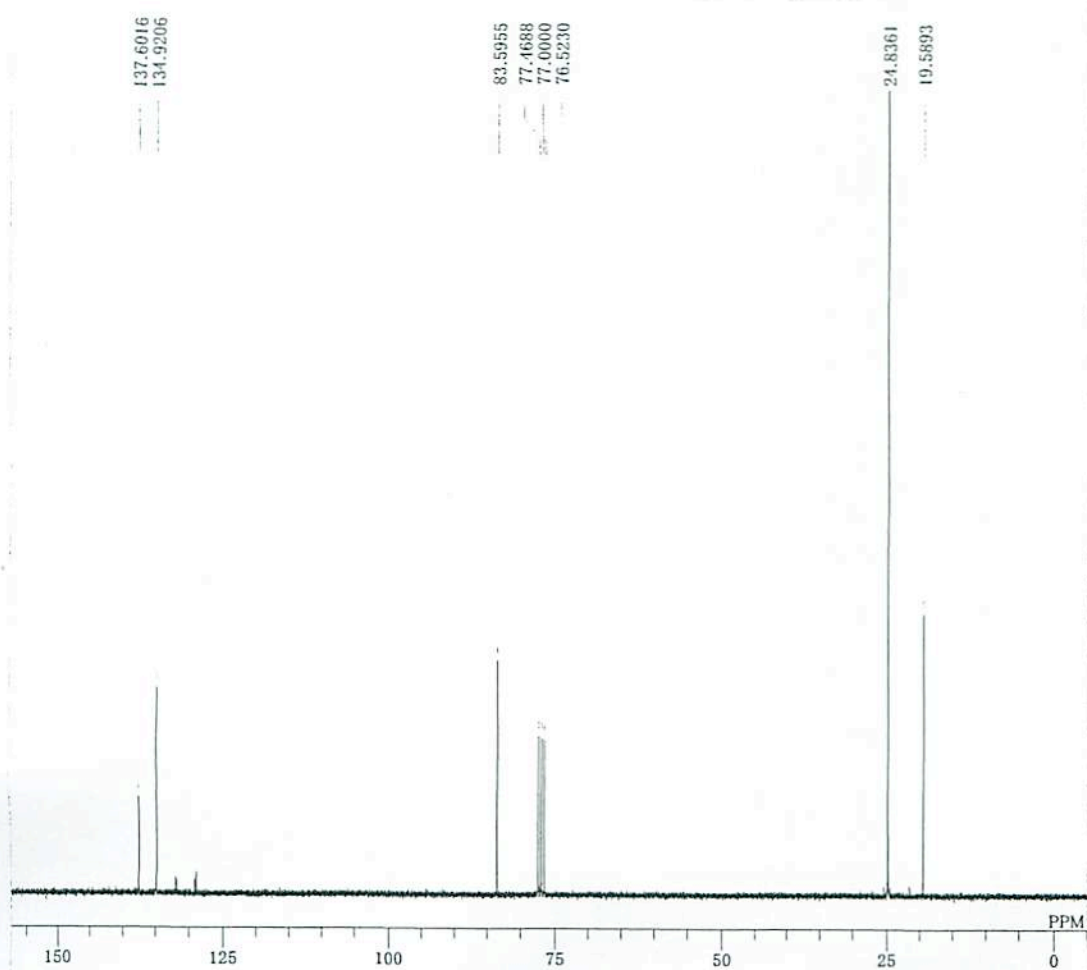

```

DFILE _DEFAULT.ALS
COMNT
DATIM
OBNUC 13C
EXMOD BCM
OBFRQ 67.80 MHz
OBSET 135.00 KHz
OBFIN 5200.00 Hz
POINT 32768
FREQU 18306.64 Hz
SCANS 863
ACQTM 1.7900 sec
PD 1.2100 sec
PW1 3.50 usec
IRNUC 1H
CTEMP 12.8 c
SLVNT CDCL3
EXREF 77.00 ppm
BF 0.12 Hz
RGAIN 27
  
```

7.2500  
6.8156

4.3993

3.7220  
3.57

1.3594  
21.00

2.03

PPM

DFILE \_DEFAULT.ALS  
COMNT  
DATIM  
OBNUC 1H  
EXMOD NON  
OBFRQ 270.05 MHz  
OBSET 112.00 KHz  
OBFIN 5800.00 Hz  
POINT 16384  
FREQU 5401.76 Hz  
SCANS 8  
ACQTM 3.0331 sec  
PD 3.9670 sec  
PW1 5.40 usec  
IRNUC 1H  
CTEMP 10.3 c  
SLVNT CDCL3  
EXREF 7.25 ppm  
BF 0.12 Hz  
RGAIN 19

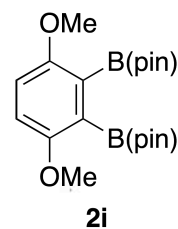

157.8981

113.8758

83.7189

77.4688

77.0000

76.5230

56.9749

24.9019

PPM

DFILE \_DEFAULT.ALS  
COMNT  
DATIM  
OBNUC 13C  
EXMOD BCM  
OBFRQ 67.80 MHz  
OBSET 135.00 KHz  
OBFIN 5200.00 Hz  
POINT 32768  
FREQU 18306.64 Hz  
SCANS 743  
ACQTM 1.7900 sec  
PD 1.2100 sec  
PW1 3.50 usec  
IRNUC 1H  
CTEMP 13.9 c  
SLVNT CDCL3  
EXREF 77.00 ppm  
BF 0.12 Hz  
RGAIN 27

7.2500  
7.0145

2.3942

1.3667

1.95

5.93

24.00

DFILE \_DEFAULT.ALS  
COMNT  
DATIM  
OBNUC 1H  
EXMOD NON  
OBFRQ 270.05 MHz  
OBSET 112.00 KHz  
OBFIN 5800.00 Hz  
POINT 16384  
FREQU 5401.76 Hz  
SCANS 8  
ACQTM 3.0331 sec  
PD 3.9670 sec  
PW1 5.40 usec  
IRNUC 1H  
CTEMP 13.1 c  
SLVNT CDCL3  
EXREF 7.25 ppm  
BF 0.12 Hz  
RGAIN 19

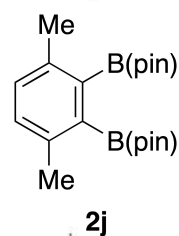

PPM

139.1806

130.8198

83.6449

77.4688

77.0000

76.5312

25.1897

22.0153

DFILE \_DEFAULT.ALS  
COMNT  
DATIM  
OBNUC 13C  
EXMOD BCM  
OBFRQ 67.80 MHz  
OBSET 135.00 KHz  
OBFIN 5200.00 Hz  
POINT 32768  
FREQU 18306.64 Hz  
SCANS 1778  
ACQTM 1.7900 sec  
PD 1.2100 sec  
PW1 3.50 usec  
IRNUC 1H  
CTEMP 14.2 c  
SLVNT CDCL3  
EXREF 77.00 ppm  
BF 0.12 Hz  
RGAIN 27

PPM

7.5465  
7.5307  
7.5160  
7.5087  
7.4965  
7.4831  
7.4514  
7.4367  
7.4245  
7.4172  
7.4038  
7.2524  
7.2500  
7.2195  
7.1902

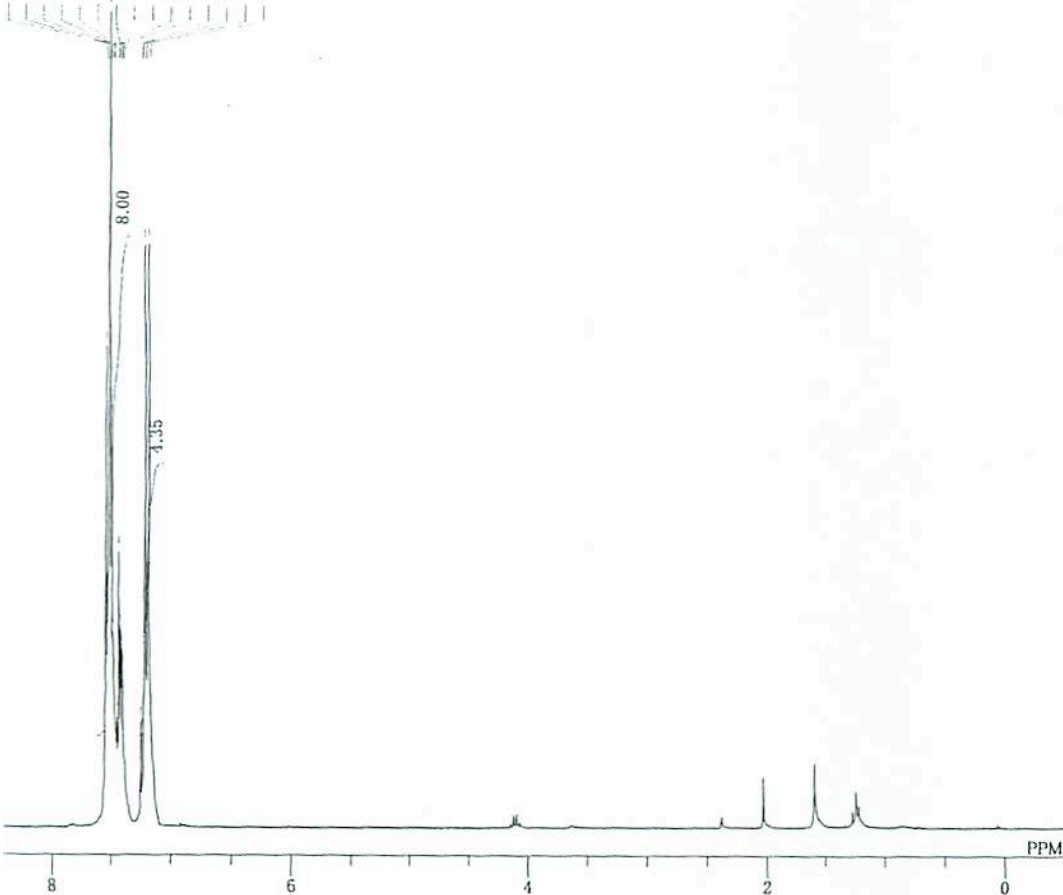

DFILE \_DEFAULT.ALS  
COMNT  
DATIM  
OBNUC  
EXMOD  
OBFRQ 270.05 MHz  
OBSET 112.00 KHz  
OBFIN 5800.00 Hz  
POINT 16384  
FREQU 5401.76 Hz  
SCANS 16  
ACQTM 3.0331 sec  
PD 3.9670 sec  
PW1 5.40 usec  
IRNUC  
CTEMP 18.5 c  
SLVNT CDCL3  
EXREF 7.25 ppm  
BF 0.12 Hz  
RGAIN 19

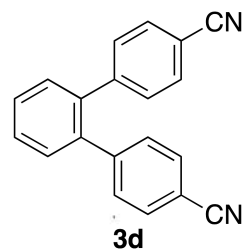

145.4800  
138.6131  
131.9765  
130.5702  
130.4468  
128.8679  
118.5716  
110.8576

77.4688  
77.0000  
76.5312

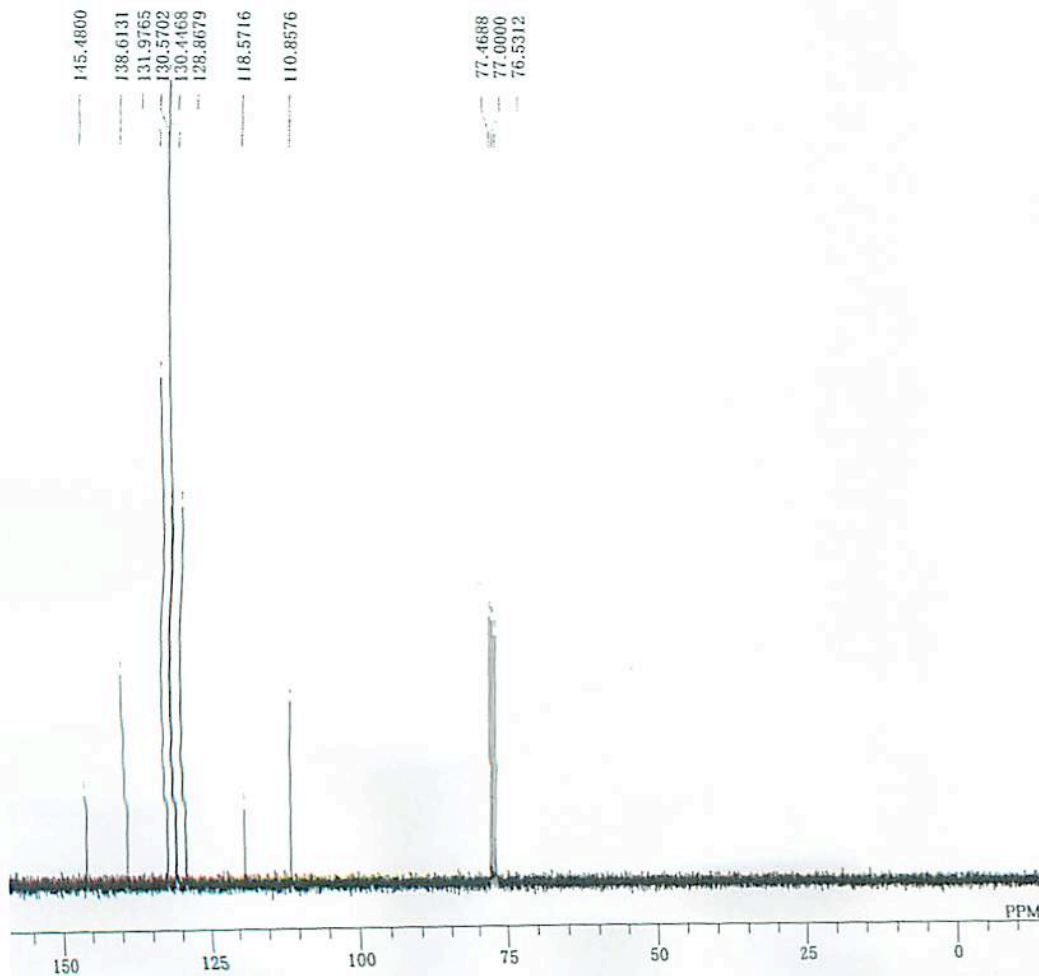

DFILE \_DEFAULT.ALS  
COMNT  
DATIM  
OBNUC  
EXMOD  
OBFRQ 67.80 MHz  
OBSET 135.00 KHz  
OBFIN 5200.00 Hz  
POINT 32768  
FREQU 18306.64 Hz  
SCANS 609  
ACQTM 1.7900 sec  
PD 1.2100 sec  
PW1 3.50 usec  
IRNUC  
CTEMP 19.9 c  
SLVNT CDCL3  
EXREF 77.00 ppm  
BF 0.12 Hz  
RGAIN 27

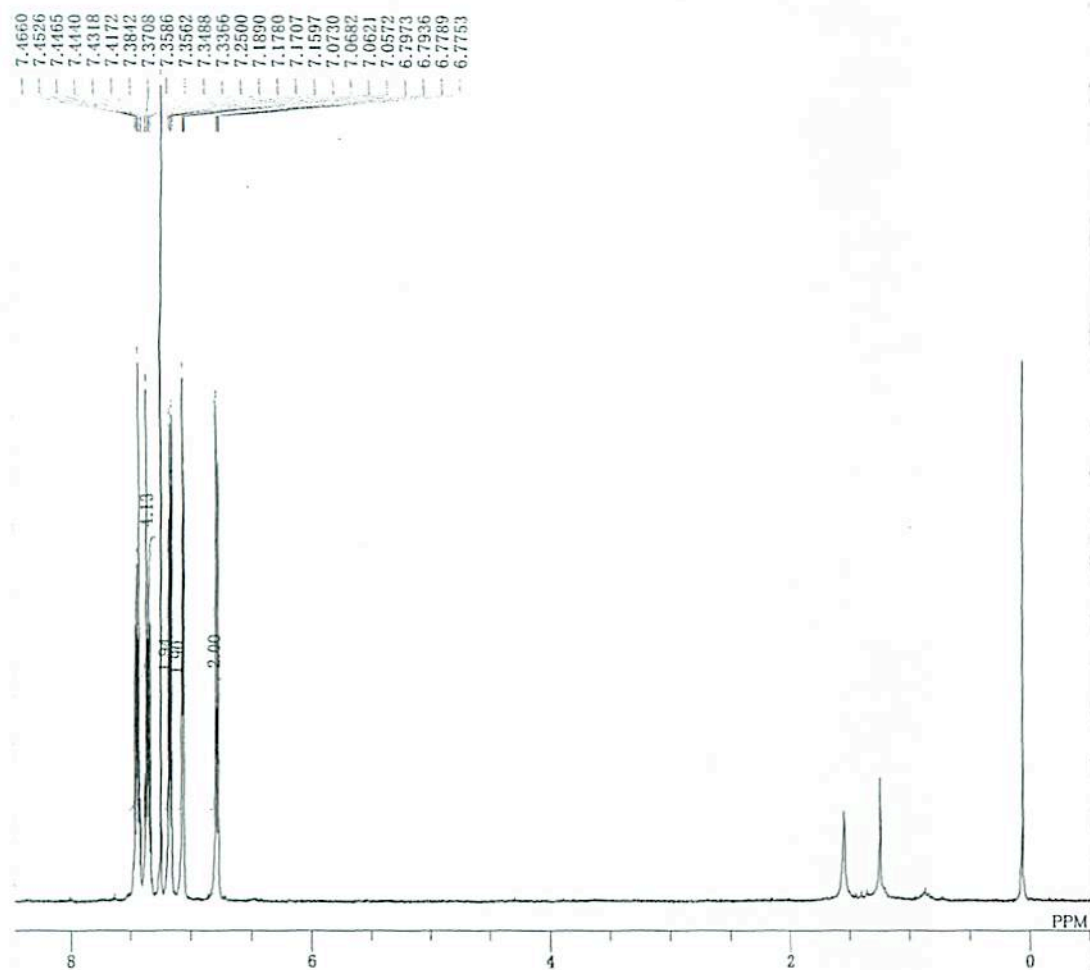

DFILE \_DEFAULT.ALS  
COMNT  
DATIM  
OBNUC 1H  
EXMOD NON  
OBFRQ 270.05 MHz  
OBSET 112.00 KHz  
OBFIN 5800.00 Hz  
POINT 16384  
FREQU 5401.76 Hz  
SCANS 8  
ACQTM 3.0331 sec  
PD 3.9670 sec  
PW1 5.40 usec  
IRNUC  
CTEMP 17.7 c  
SLVNT CDCL3  
EXREF 7.25 ppm  
BF 0.12 Hz  
RGAIN 22

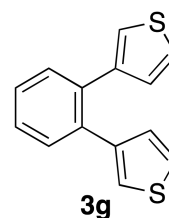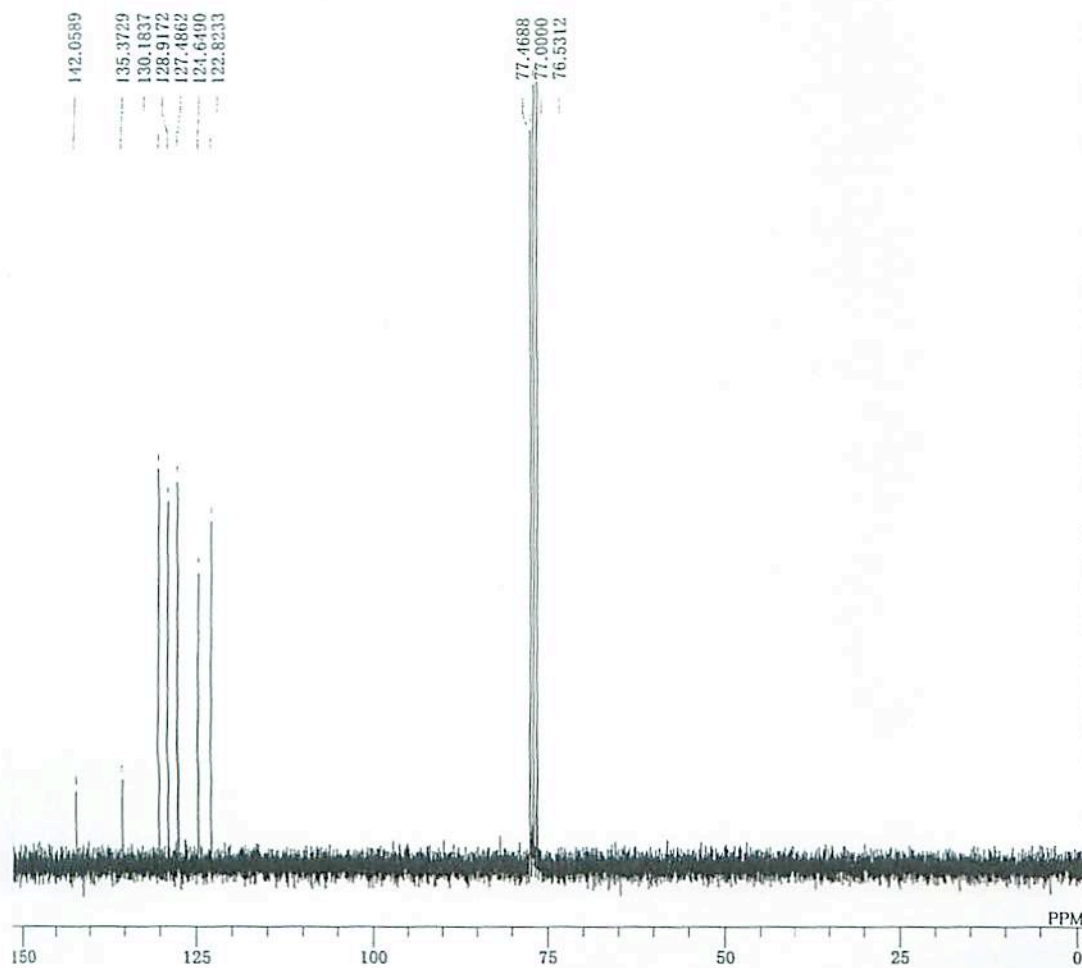

DFILE \_DEFAULT.ALS  
COMNT  
DATIM  
OBNUC 13C  
EXMOD BCM  
OBFRQ 67.80 MHz  
OBSET 135.00 KHz  
OBFIN 5200.00 Hz  
POINT 32768  
FREQU 18306.64 Hz  
SCANS 882  
ACQTM 1.7900 sec  
PD 1.2100 sec  
PW1 3.50 usec  
IRNUC  
CTEMP 22.1 c  
SLVNT CDCL3  
EXREF 77.00 ppm  
BF 0.12 Hz  
RGAIN 28

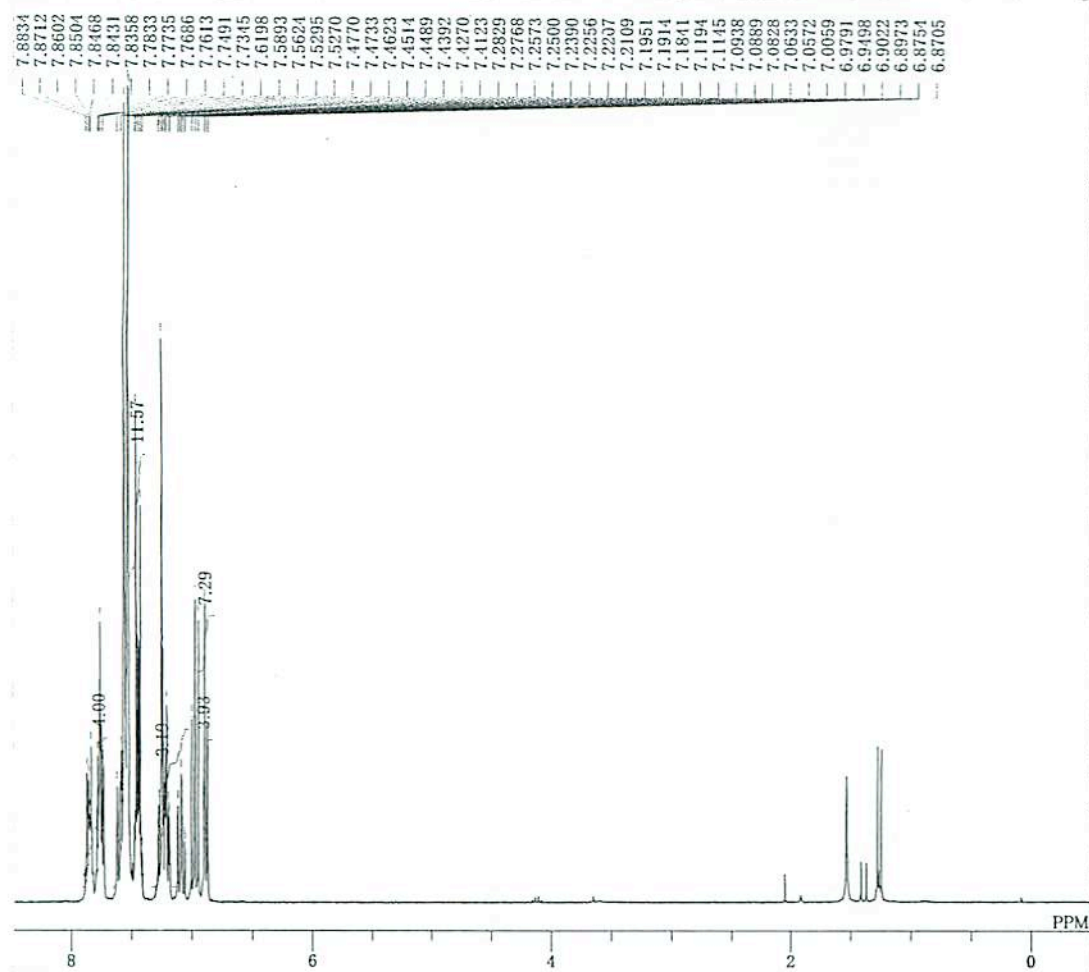

DFILE \_DEFAULT.ALS  
 COMNT  
 DATIM  
 OBNUC  
 EXMOD  
 OBFRQ 270.05 MHz  
 OBSET 112.00 KHz  
 OBFIN 5800.00 Hz  
 POINT 16384  
 FREQU 5401.76 Hz  
 SCANS 8  
 ACQTM 3.0331 sec  
 PD 3.9670 sec  
 PW1 5.40 usec  
 IRNUC  
 CTEMP 19.6 c  
 SLVNT CDCL3  
 EXREF 7.25 ppm  
 BF 0.12 Hz  
 RGAIN 19

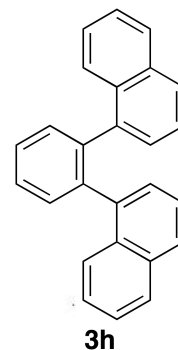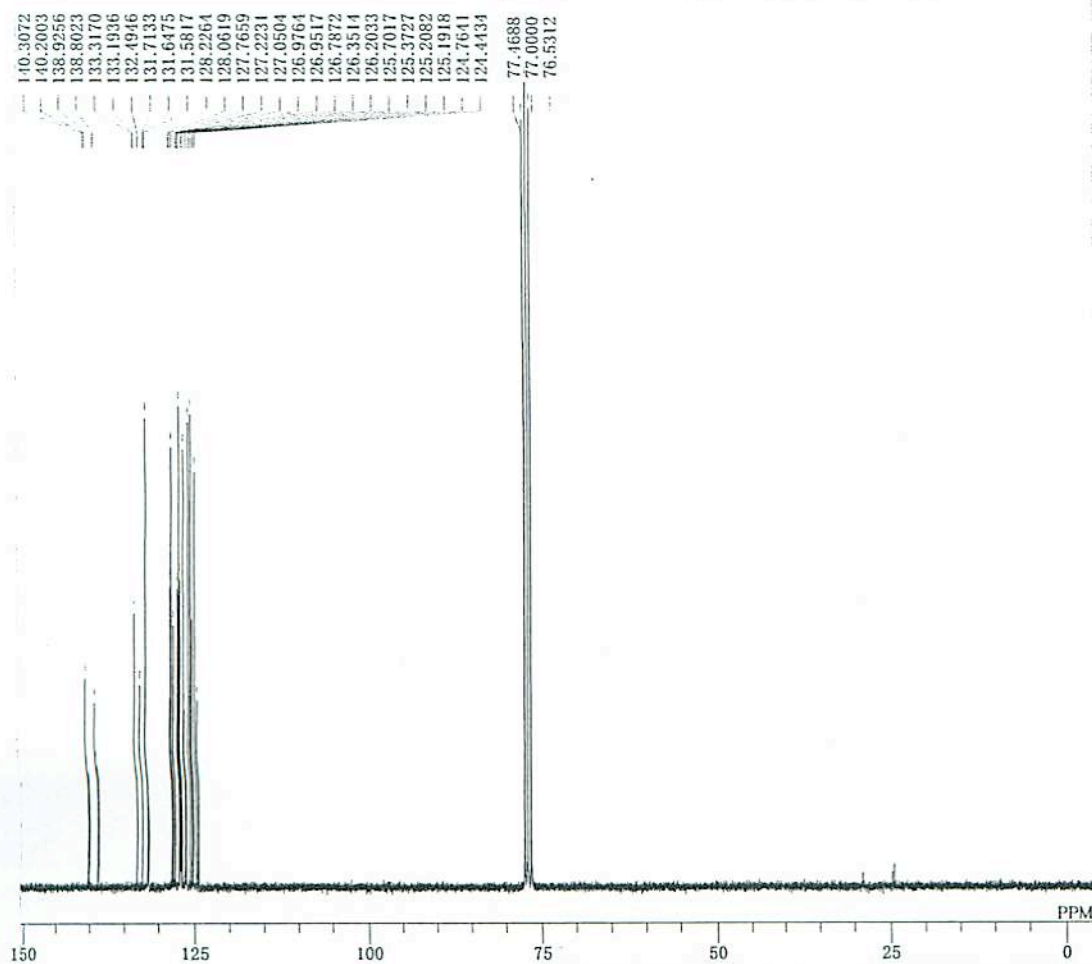

DFILE \_DEFAULT.ALS  
 COMNT  
 DATIM  
 OBNUC  
 EXMOD  
 OBFRQ 67.80 MHz  
 OBSET 135.00 KHz  
 OBFIN 5200.00 Hz  
 POINT 32768  
 FREQU 18305.64 Hz  
 SCANS 11064  
 ACQTM 1.7900 sec  
 PD 1.2100 sec  
 PW1 3.50 usec  
 IRNUC  
 CTEMP 20.4 c  
 SLVNT CDCL3  
 EXREF 77.00 ppm  
 BF 0.12 Hz  
 RGAIN 28

8.0876  
8.0811  
8.0727  
8.0554  
8.0311  
8.0230  
7.4806  
7.4770  
7.4721  
7.4684  
7.4641  
7.4578  
7.4355  
7.4237  
7.4106  
7.4086  
7.4061  
7.4048  
7.4038  
7.4013  
7.3939  
7.3756  
7.3681  
7.3653  
7.3500  
7.3439  
7.3329  
7.3297  
7.3281  
7.3263  
7.1121  
7.1023  
7.0962  
6.8711  
7.0767

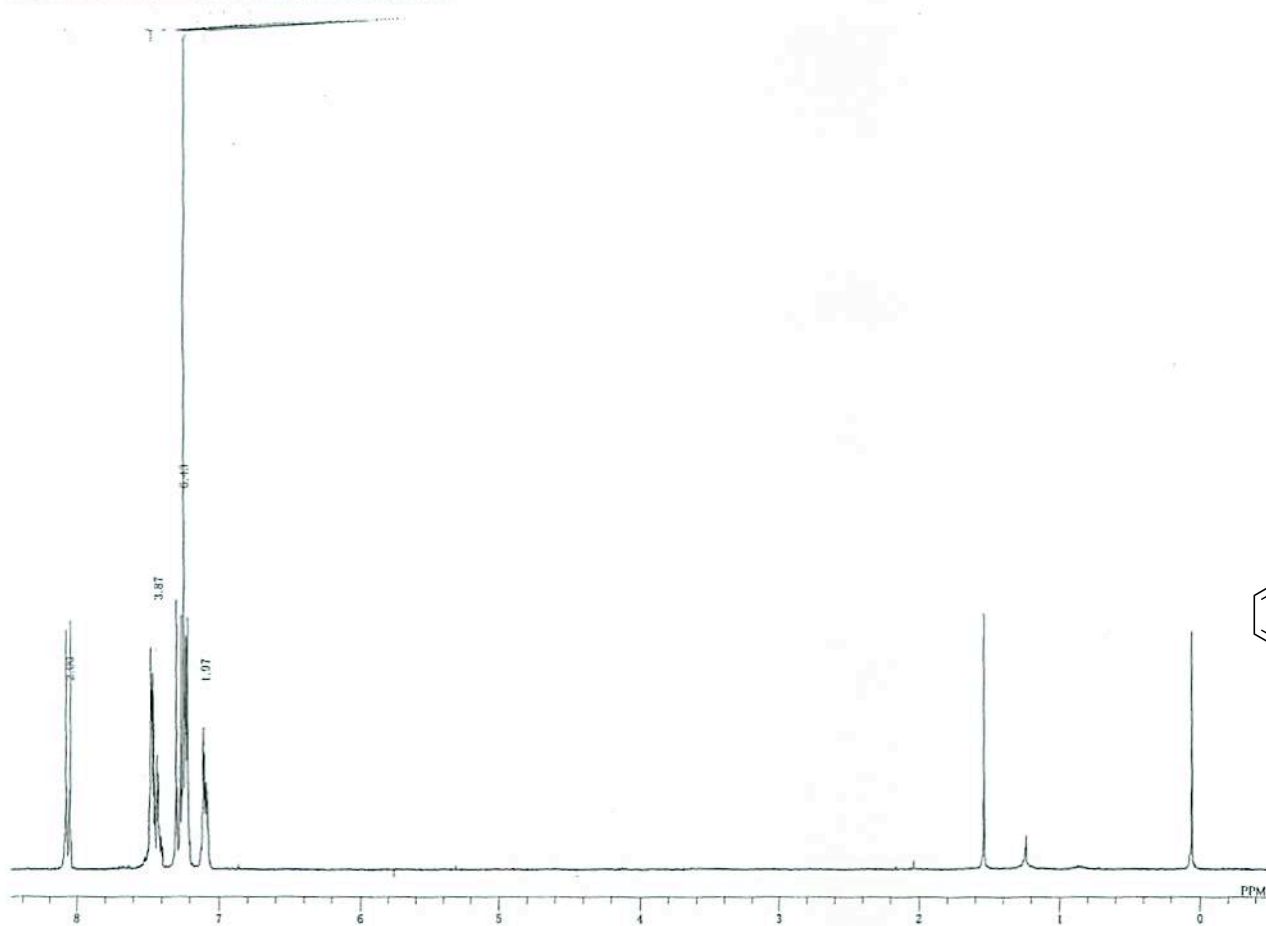

DFILE \_DEFAULT.ALS  
COMNT  
DATIM  
OBNUC 1H  
EXMOD NON  
OBFRQ 270.05 MHz  
OBSET 112.00 KHz  
OBFIN 5800.00 Hz  
POINT 16384  
FREQU 5401.76 Hz  
SCANS 8  
ACQTM 3.0331 sec  
PD 3.9670 sec  
PW1 5.40 usec  
IRNUC 1H  
CTEMP 18.2 c  
SLVNT CDCL3  
EXREF 7.25 ppm  
BF 0.12 Hz  
RGAIN 24

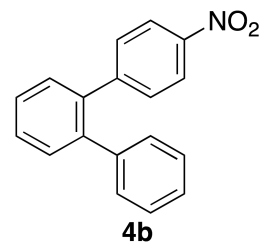

148.5229  
140.7184  
138.1855  
130.8991  
130.6360  
130.2577  
129.7807  
128.7692  
128.5553  
128.2346  
127.7823  
127.0339  
123.1934

77.4688  
77.0000  
76.5312

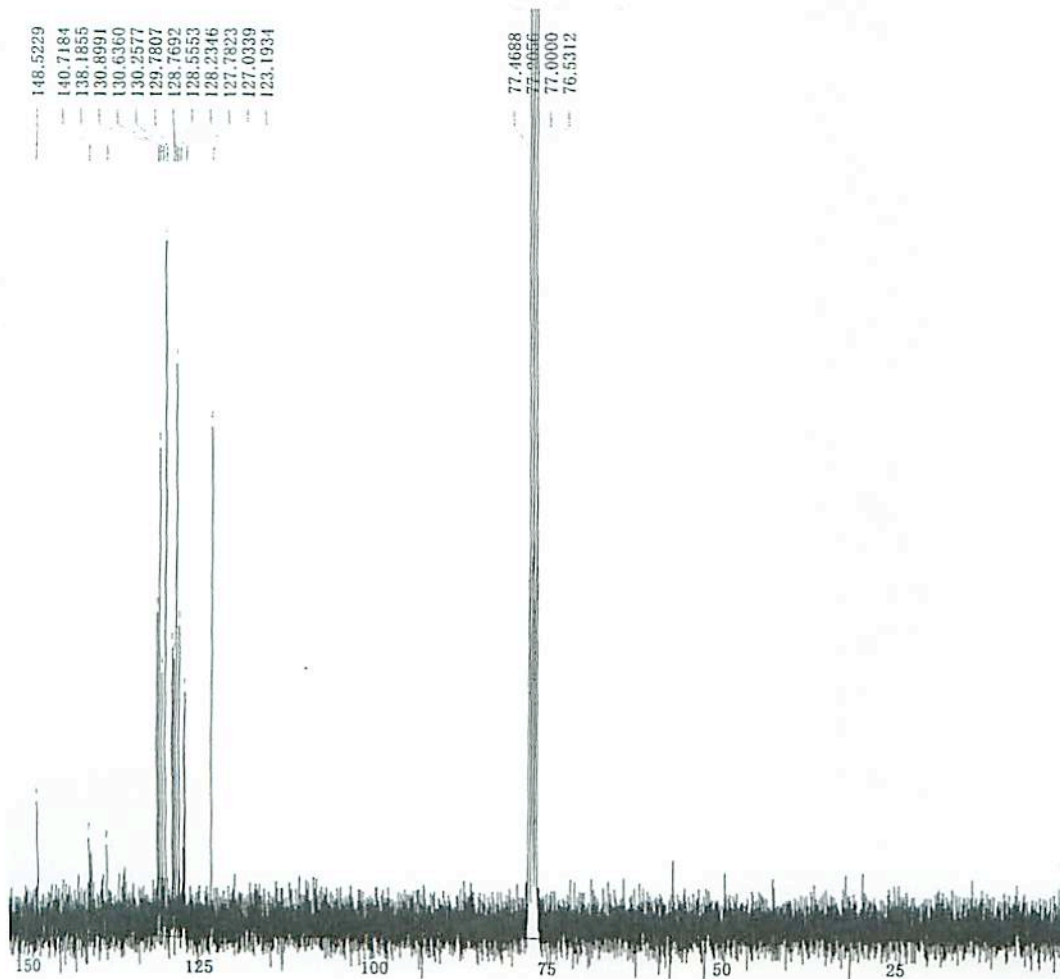

DFILE \_DEFAULT.ALS  
COMNT  
DATIM  
OBNUC 13C  
EXMOD BCM  
OBFRQ 67.80 MHz  
OBSET 135.00 KHz  
OBFIN 5200.00 Hz  
POINT 32768  
FREQU 18306.64 Hz  
SCANS 11431  
ACQTM 1.7900 sec  
PD 1.2100 sec  
PW1 3.50 usec  
IRNUC 1H  
CTEMP 12.1 c  
SLVNT CDCL3  
EXREF 77.00 ppm  
BF 0.12 Hz  
RGAIN 27

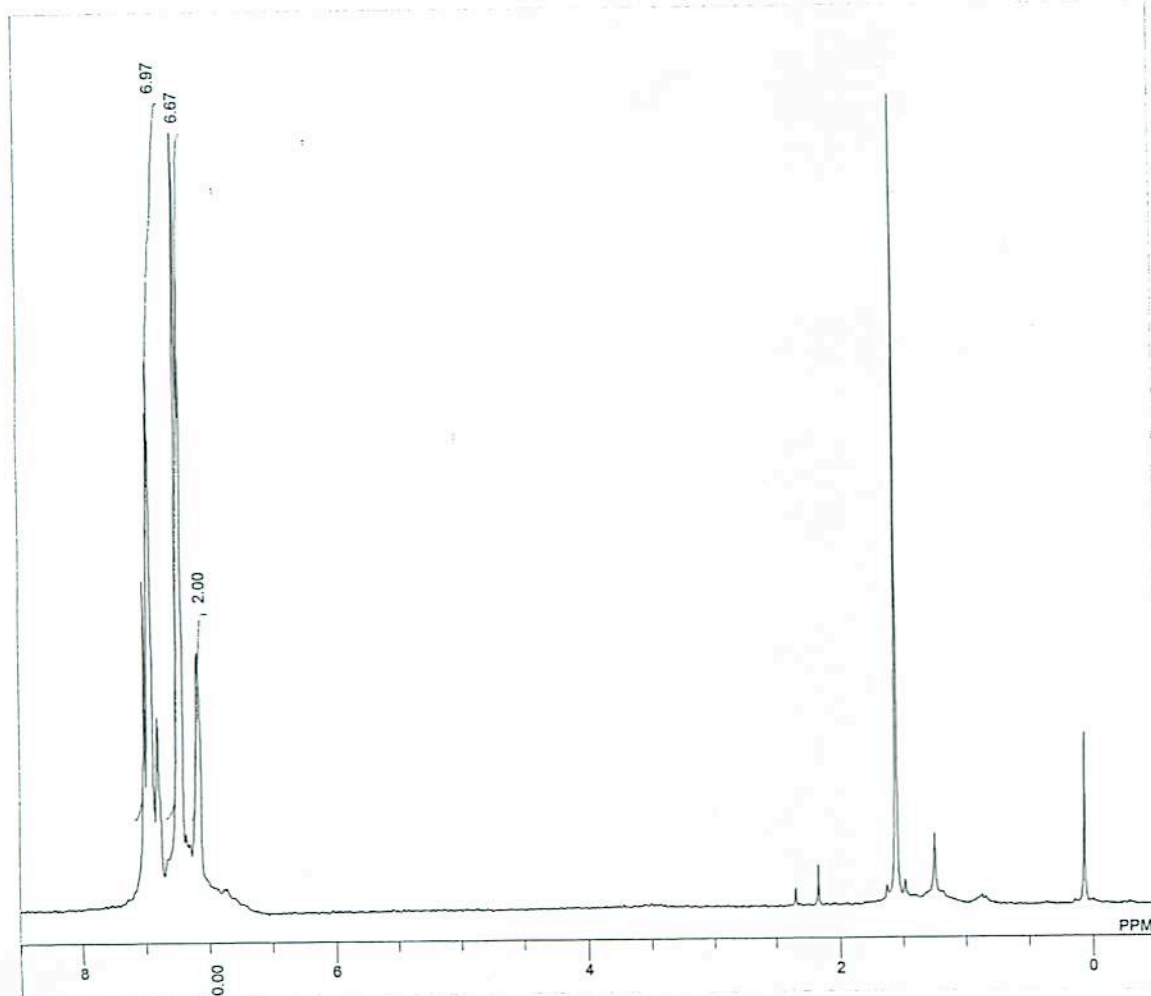

DFILE \_DEFAULT.ALS  
 COMNT  
 DATIM  
 OBNUC 1H  
 EXMOD NON  
 OBFRQ 270.05 MHz  
 OBSET 112.00 KHz  
 OBFIN 5800.00 Hz  
 POINT 16384  
 FREQU 5401.76 Hz  
 SCANS 16  
 ACQTM 3.0331 sec  
 PD 3.9670 sec  
 PW1 5.40 usec  
 IRNUC 1H  
 CTEMP 17.6 c  
 SLVNT CDCL3  
 EXREF 7.26 ppm  
 BF 1.62 Hz  
 RGAIN 25

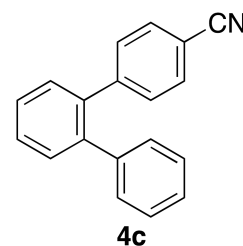

C:\WinLambda\COMMONY\_DEFAULT.ALS

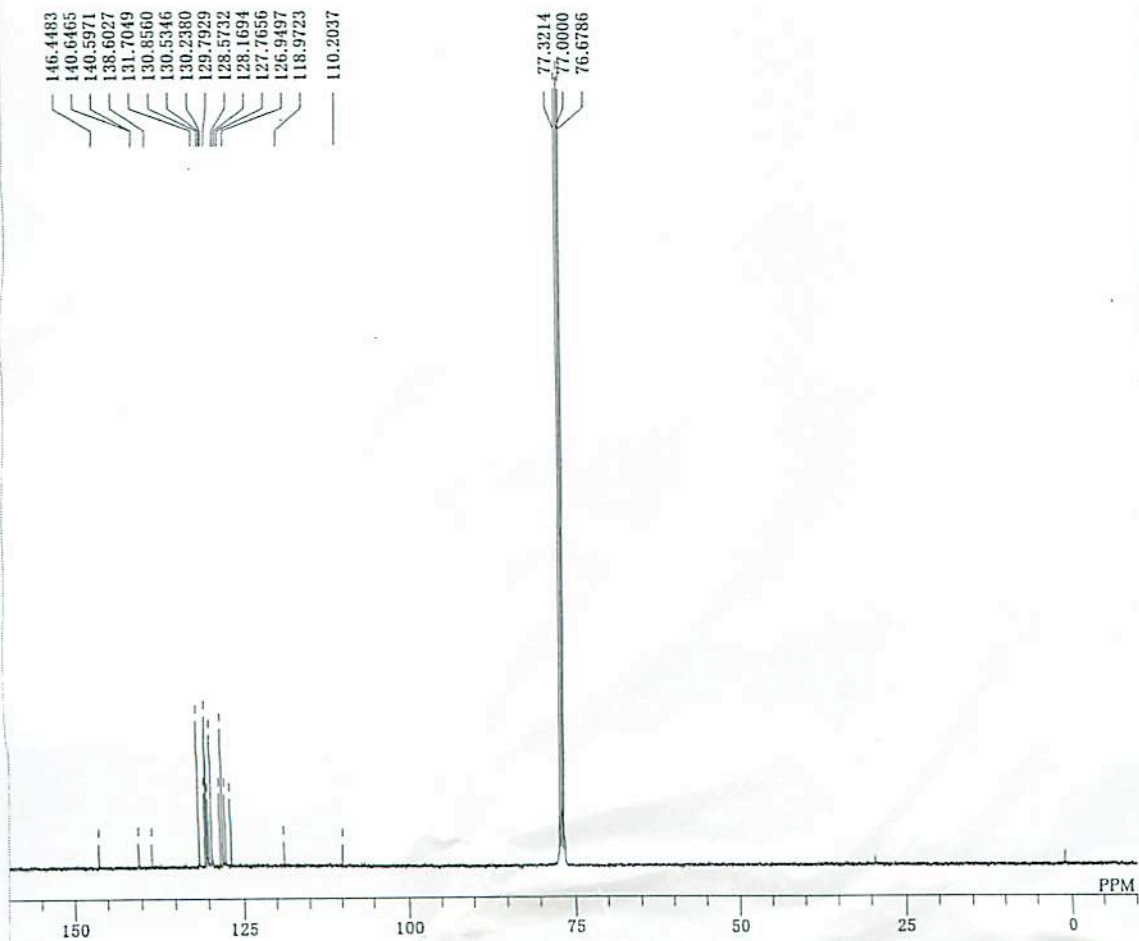

DFILE \_DEFAULT.ALS  
 COMNT  
 DATIM  
 OBNUC 13C  
 EXMOD bcm  
 OBFRQ 99.45 MHz  
 OBSET 0.00 KHz  
 OBFIN 104750.00 Hz  
 POINT 32768  
 FREQU 26881.72 Hz  
 SCANS 11183  
 ACQTM 1.2190 sec  
 PD 1.7810 sec  
 PW1 4.25 usec  
 IRNUC 1H  
 CTEMP 21.0 c  
 SLVNT CDCL3  
 EXREF 77.00 ppm  
 BF 1.62 Hz  
 RGAIN 27

7.5160  
7.5092  
7.5024  
7.4956  
7.4888  
7.4820  
7.4752  
7.4684  
7.4616  
7.4548  
7.4480  
7.4412  
7.4344  
7.4276  
7.4208  
7.4140  
7.4072  
7.4004  
7.3936  
7.3868  
7.3800  
7.3732  
7.3664  
7.3596  
7.3528  
7.3460  
7.3392  
7.3324  
7.3256  
7.3188  
7.3120  
7.3052  
7.2984  
7.2916  
7.2848  
7.2780  
7.2712  
7.2644  
7.2576  
7.2508  
7.2440  
7.2372  
7.2304  
7.2236  
7.2168  
7.2100  
7.2032  
7.1964  
7.1896  
7.1828  
7.1760  
7.1692  
7.1624  
7.1556  
7.1488  
7.1420  
7.1352  
7.1284  
7.1216  
7.1148  
7.1080  
7.1012  
7.0944  
7.0876  
7.0808  
7.0740  
7.0672  
7.0604  
7.0536  
7.0468  
7.0400  
7.0332  
7.0264  
7.0196  
7.0128  
7.0060  
6.9992  
6.9924  
6.9856  
6.9788  
6.9720  
6.9652  
6.9584  
6.9516  
6.9448  
6.9380  
6.9312  
6.9244  
6.9176  
6.9108  
6.9040  
6.8972  
6.8904  
6.8836  
6.8768  
6.8700  
6.8632  
6.8564  
6.8496  
6.8428  
6.8360  
6.8292  
6.8224  
6.8156  
6.8088  
6.8020  
6.7952  
6.7884  
6.7816  
6.7748  
6.7680  
6.7612  
6.7544  
6.7476  
6.7408  
6.7340  
6.7272  
6.7204  
6.7136  
6.7068  
6.6999

DFILE \_DEFAULT.ALS  
COMNT  
DATIM  
OBNUC 1H  
EXMOD NON  
OBFRQ 270.05 MHz  
OBSET 112.00 KHz  
OBFIN 5800.00 Hz  
POINT 16384  
FREQU 5401.75 Hz  
SCANS 16  
ACQTM 3.0331 sec  
PD 3.9670 sec  
PWI 5.40 usec  
IRNUC 1H  
CTEMP 18.1 c  
SLVNT CDCL3  
EXREF 7.25 ppm  
BF 0.12 Hz  
RGAIN 22

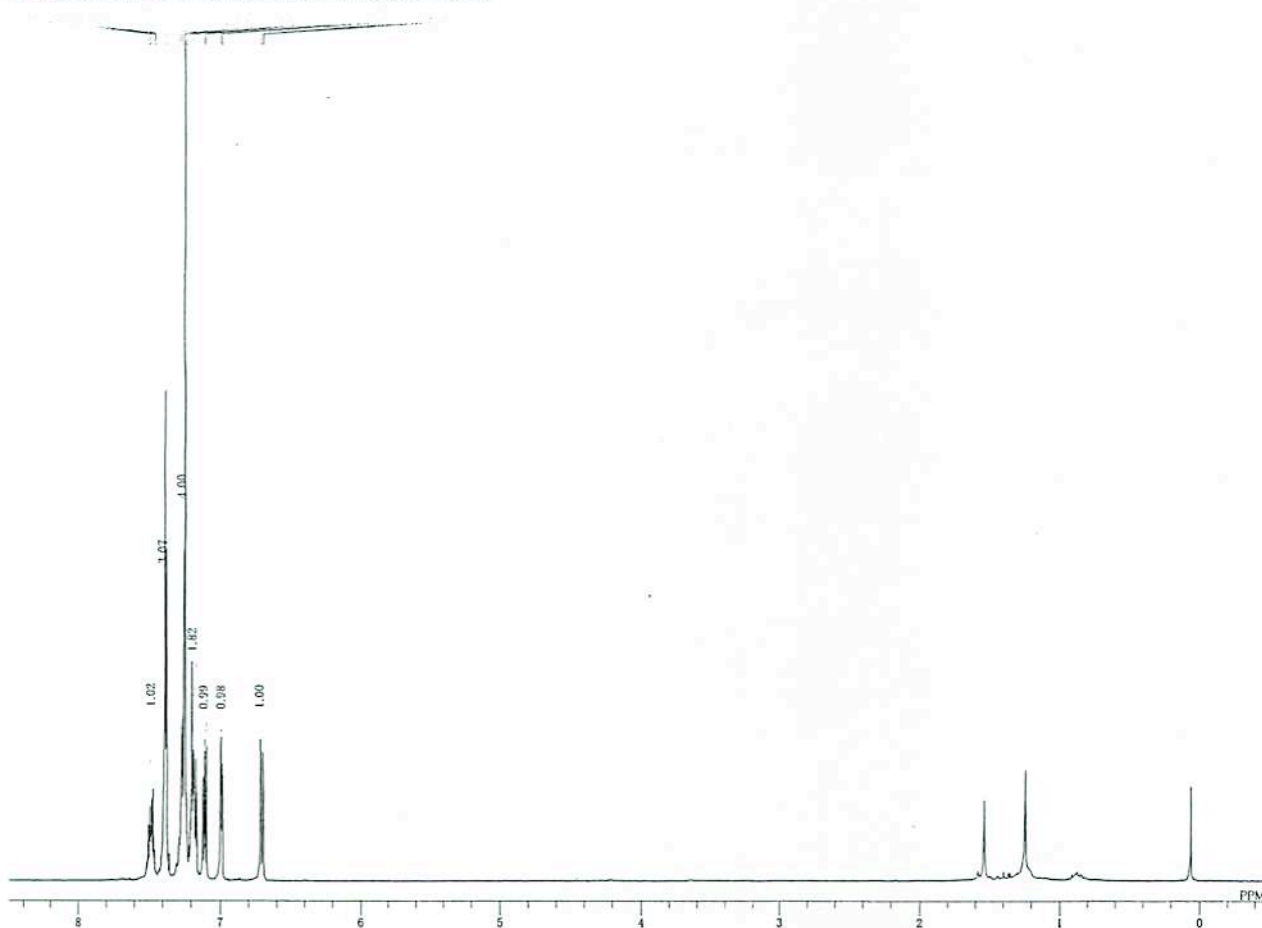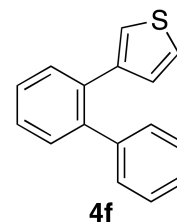

141.9109  
141.6148  
140.5293  
135.1591  
130.5620  
130.0685  
129.5422  
129.0734  
127.9468  
127.4780  
127.4287  
126.6885  
124.4763  
122.9631

77.4688  
77.0000  
76.5230

DFILE \_DEFAULT.ALS  
COMNT  
DATIM  
OBNUC 13C  
EXMOD BCM  
OBFRQ 67.80 MHz  
OBSET 135.00 KHz  
OBFIN 5200.00 Hz  
POINT 32768  
FREQU 18306.64 Hz  
SCANS 1047  
ACQTM 1.7900 sec  
PD 1.2100 sec  
PWI 3.50 usec  
IRNUC 1H  
CTEMP 14.4 c  
SLVNT CDCL3  
EXREF 77.00 ppm  
BF 0.12 Hz  
RGAIN 27

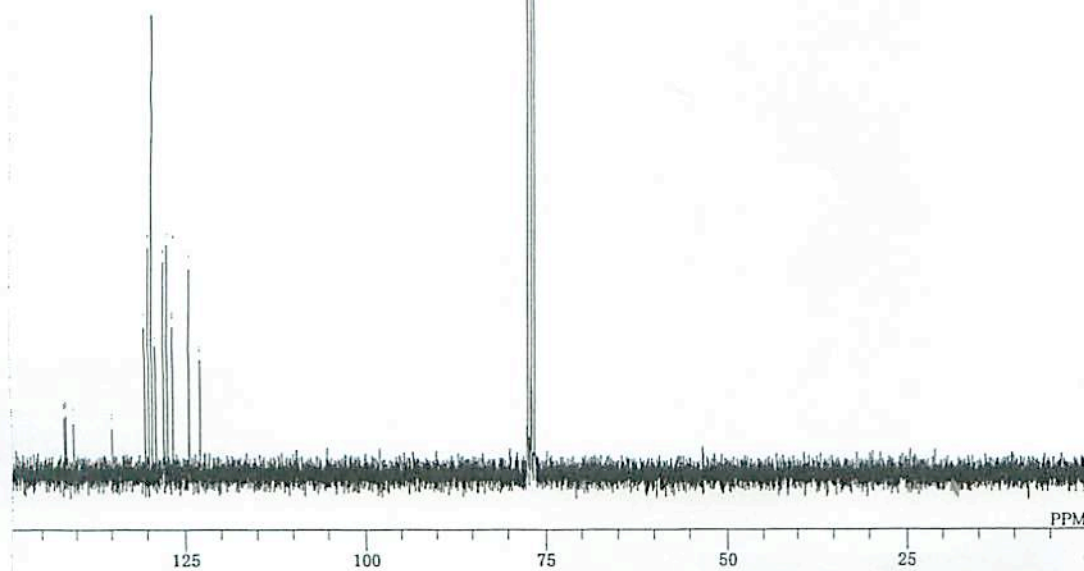

7.0001  
7.7956  
7.7517  
7.7211  
7.6882  
7.6565  
7.5332  
7.5247  
7.5149  
7.4893  
7.4637  
7.4563  
7.4380  
7.4124  
7.3868  
7.3819  
7.3599  
7.3343  
7.3050  
7.2623  
7.1952  
7.1903  
7.1793  
7.1695  
7.0707  
7.0536  
7.0304  
7.0048

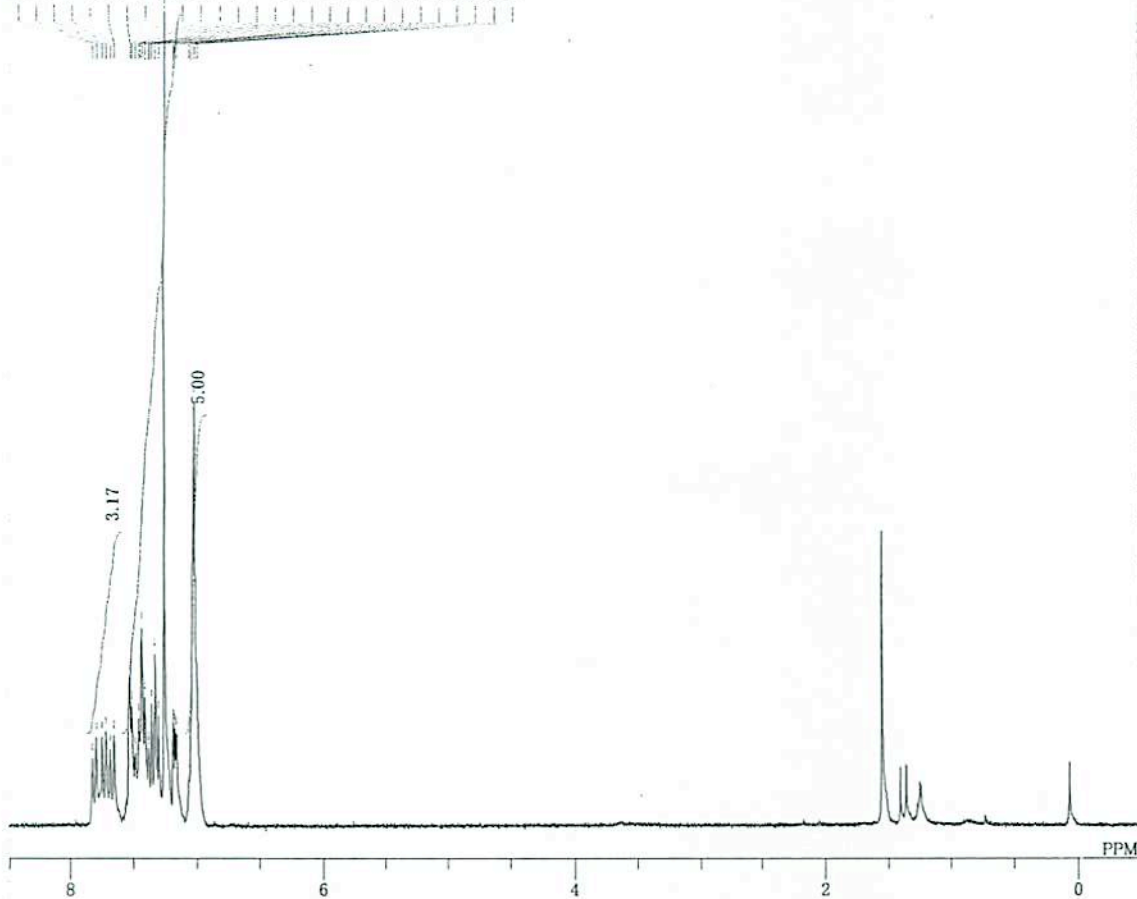

DFILE \_DEFAULT.ALS  
COMNT  
DATIM  
OBNUC  
EXMOD  
OBFRQ 270.05 MHz  
OBSET 112.00 KHz  
OBFIN 5800.00 Hz  
POINT 16384  
FREQU 5401.76 Hz  
SCANS 16  
ACQTM 3.0331 sec  
PD 3.9670 sec  
PW1 5.40 usec  
IRNUC  
CTEMP 17.5 c  
SLVNT CDCL3  
EXREF 0.00 ppm  
BF 0.12 Hz  
RGAIN 25

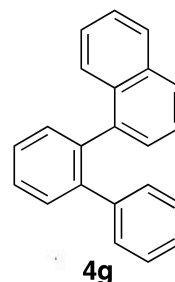

141.9109  
141.3434  
139.3450  
138.8845  
133.4156  
132.1985  
131.6886  
130.2741  
129.0899  
128.1359  
128.0537  
127.7741  
127.5603  
127.1984  
126.9024  
126.3431  
126.2527  
125.7346  
125.4714  
125.0026

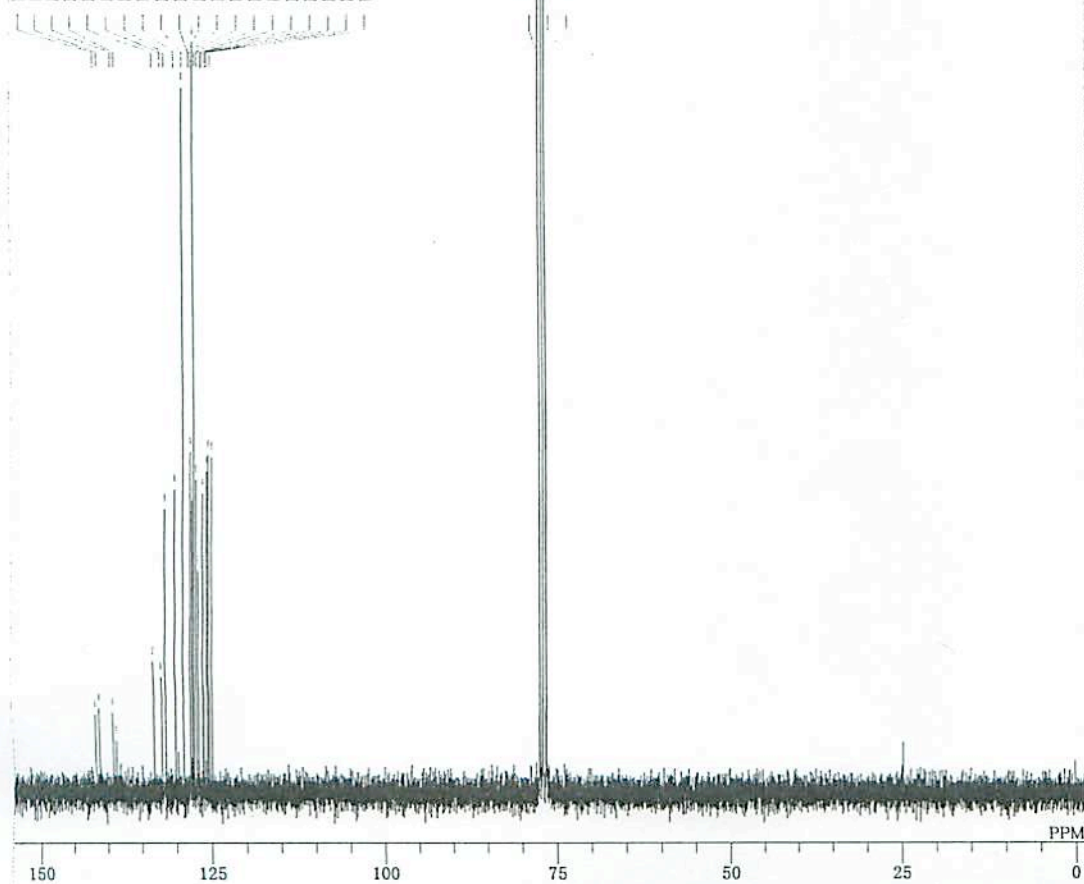

DFILE \_DEFAULT.ALS  
COMNT  
DATIM  
OBNUC  
EXMOD  
OBFRQ 67.80 MHz  
OBSET 135.00 KHz  
OBFIN 5200.00 Hz  
POINT 32768  
FREQU 18306.64 Hz  
SCANS 1475  
ACQTM 1.7900 sec  
PD 1.2100 sec  
PW1 3.50 usec  
IRNUC  
CTEMP 20.5 c  
SLVNT CDCL3  
EXREF 77.00 ppm  
BF 0.12 Hz  
RGAIN 26

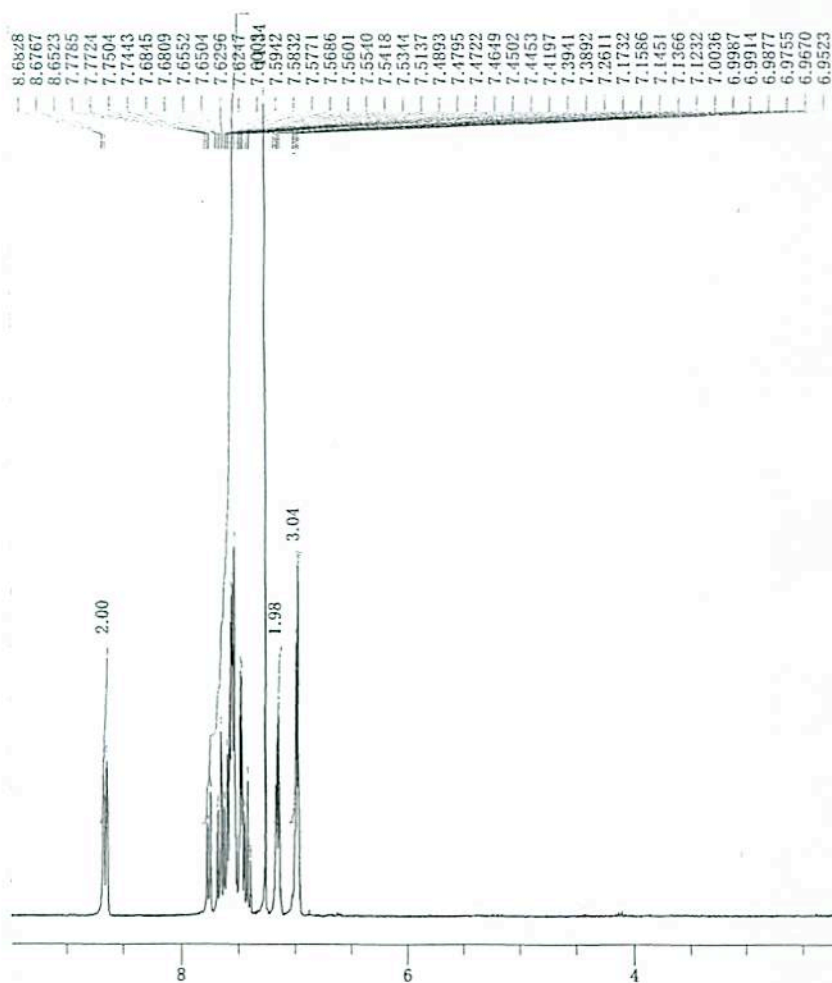

DFILE \_DEFAULT.ALS  
 COMNT  
 DATIM  
 OBNUC 1H  
 EXMOD NON  
 OBFRQ 270.05 MHz  
 OBSET 112.00 KHz  
 OBFIN 5800.00 Hz  
 POINT 16384  
 FREQU 5401.76 Hz  
 SCANS 16  
 ACQTM 3.0331 sec  
 PD 3.9670 sec  
 PW1 5.40 usec  
 IRNUC 1H  
 CTEMP 17.0 c  
 CDCL3  
 SLVNT  
 EXREF 0.00 ppm  
 BF 0.12 Hz  
 RGAIN 22

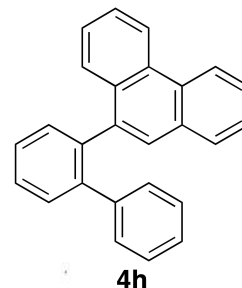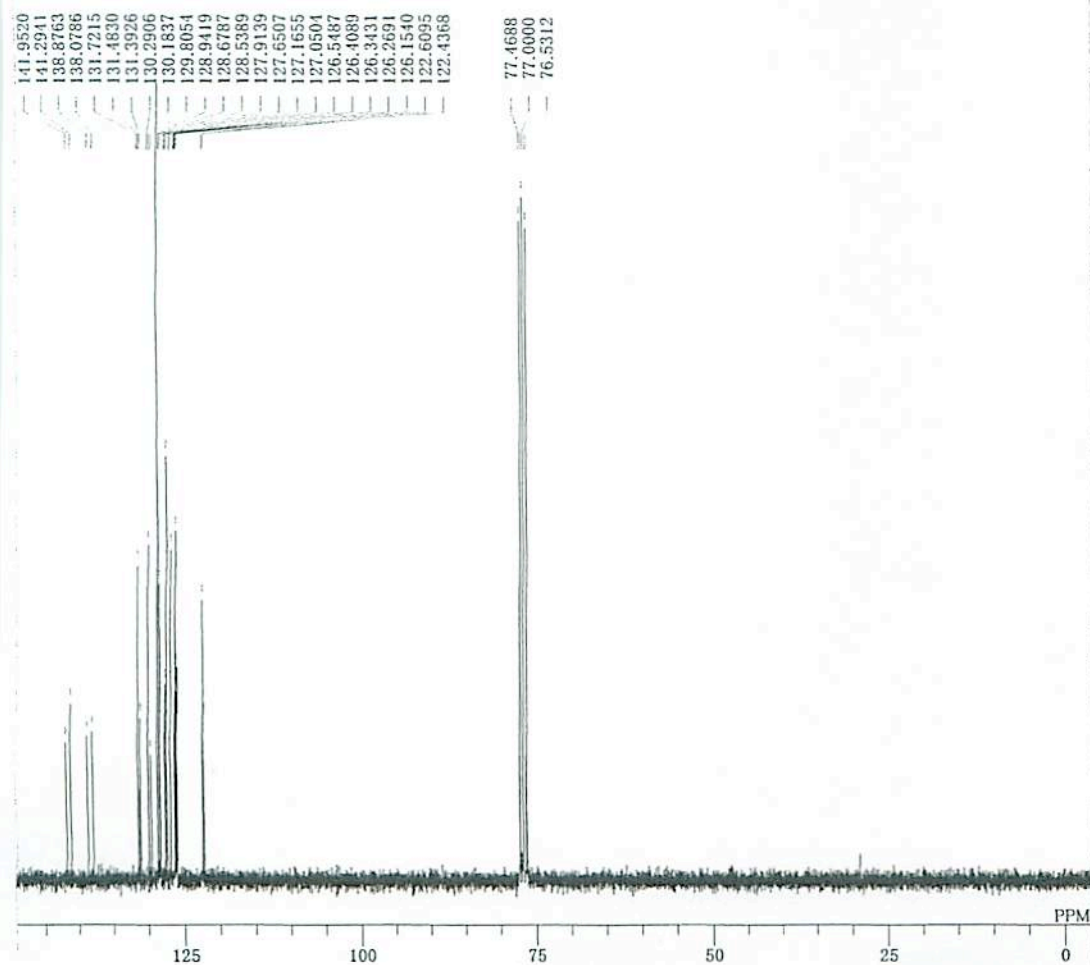

DFILE \_DEFAULT.ALS  
 COMNT  
 DATIM  
 OBNUC 13C  
 EXMOD BCM  
 OBFRQ 67.80 MHz  
 OBSET 135.00 KHz  
 OBFIN 5200.00 Hz  
 POINT 32768  
 FREQU 18306.64 Hz  
 SCANS 1870  
 ACQTM 1.7900 sec  
 PD 1.2100 sec  
 PW1 3.50 usec  
 IRNUC 13C  
 CTEMP 20.5 c  
 CDCL3  
 SLVNT  
 EXREF 77.00 ppm  
 BF 0.12 Hz  
 RGAIN 26

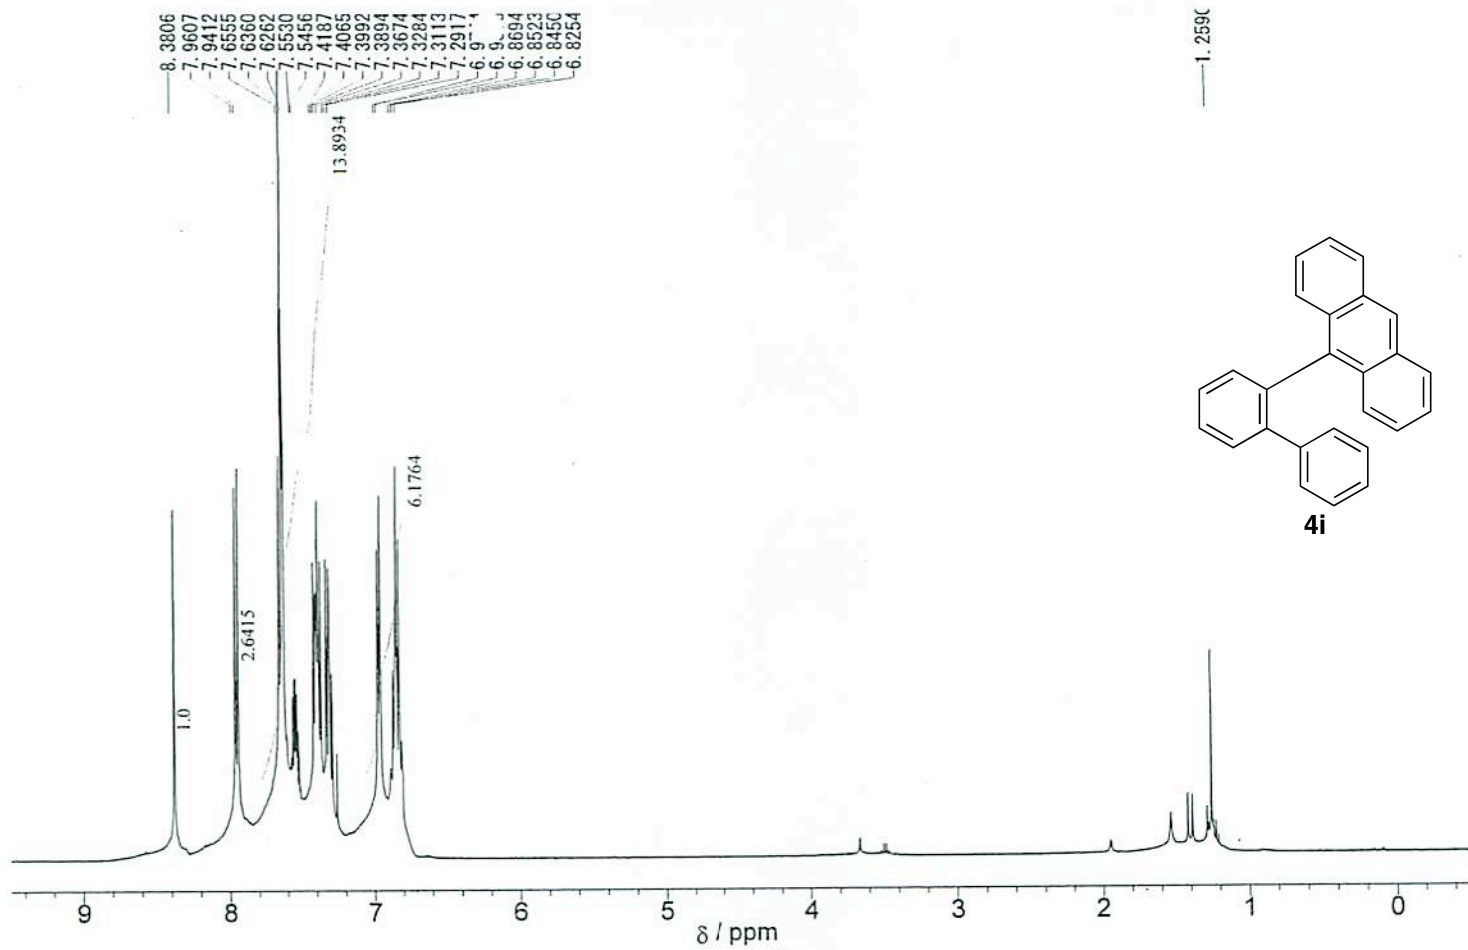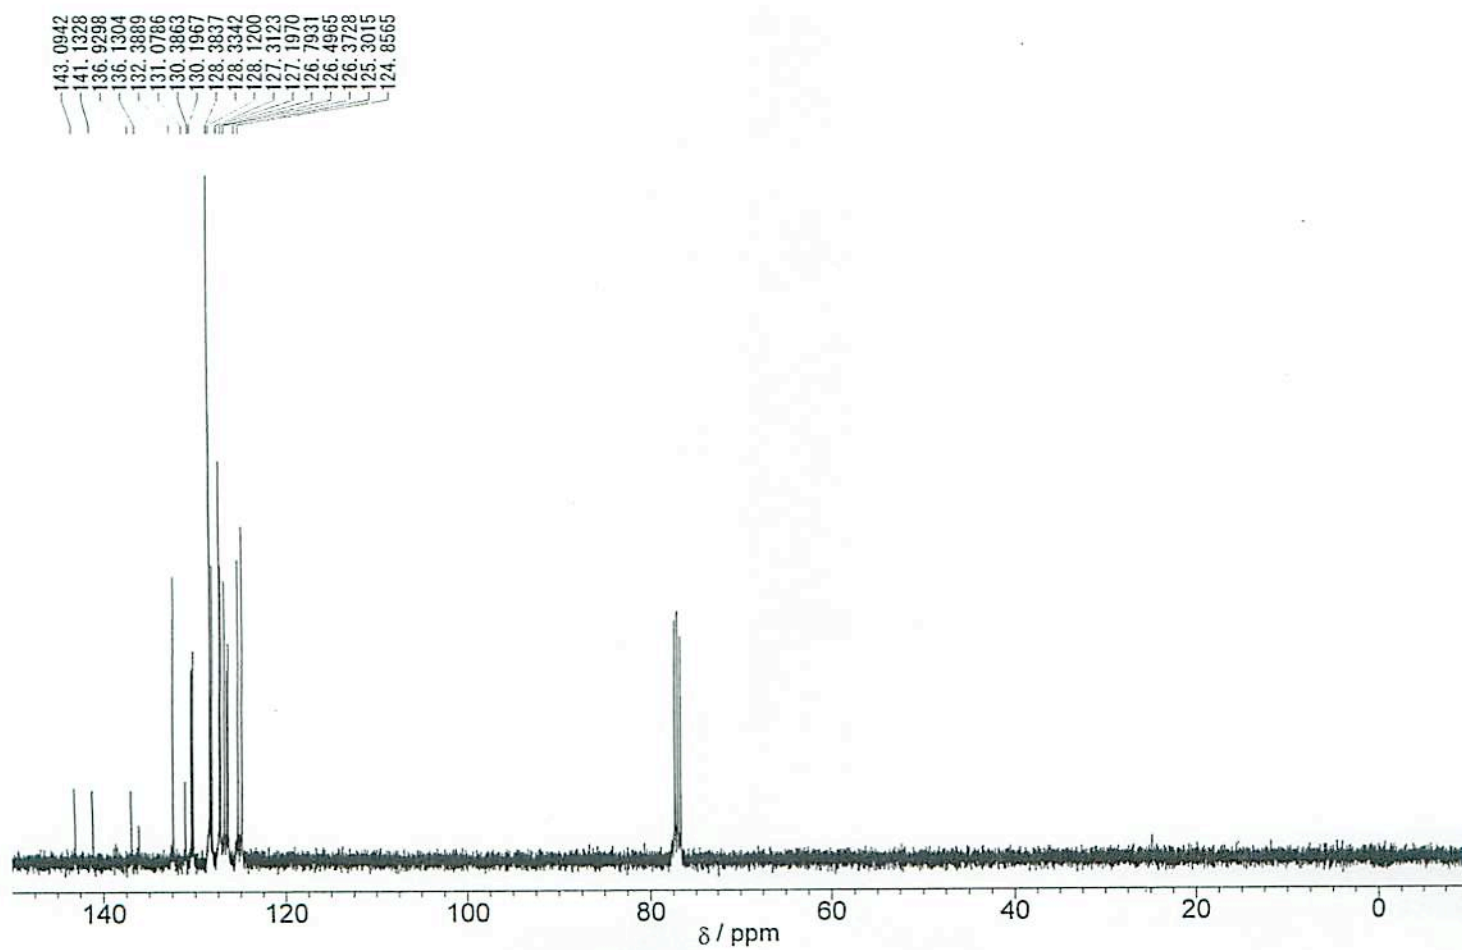

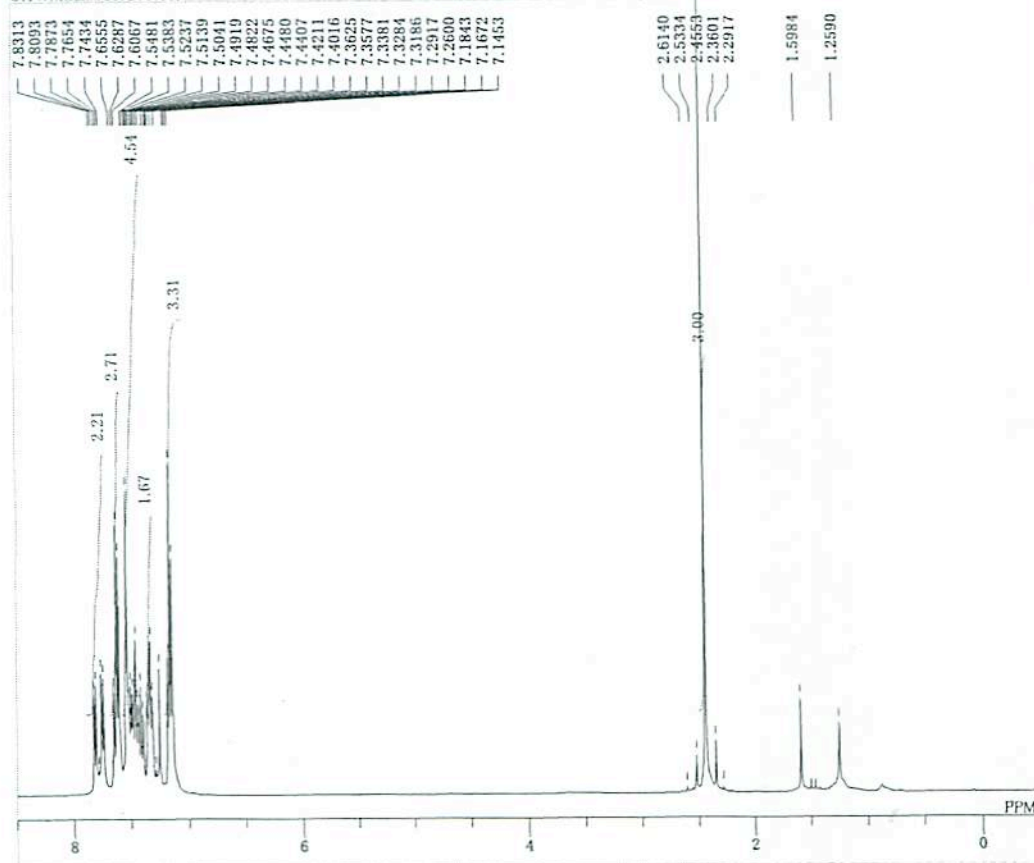

204afterGPC400.als

|       |                    |
|-------|--------------------|
| DFILE | 204afterGPC400.als |
| COMNT |                    |
| DATIM |                    |
| OBNUC |                    |
| EXMOD | 1H                 |
| OBFRQ | non                |
| OBSET | 395.75 MHz         |
| OBFIN | 0.00 KHz           |
| POINT | 134498.00 Hz       |
| FREQU | 8192               |
| SCANS | 7917.66 Hz         |
| ACQTM | 8                  |
| PD    | 1.0346 sec         |
| PW1   | 5.9650 sec         |
| IRNUC | 5.75 usec          |
| CTEMP | 1H                 |
| SLVNT | 18.4 c             |
| EXREF | CDCL3              |
| BF    | 7.26 ppm           |
| RGAIN | 1.62 Hz            |
|       | 16                 |

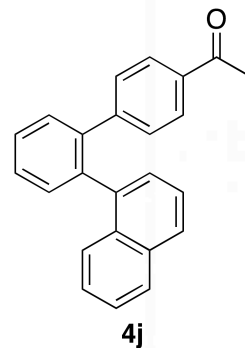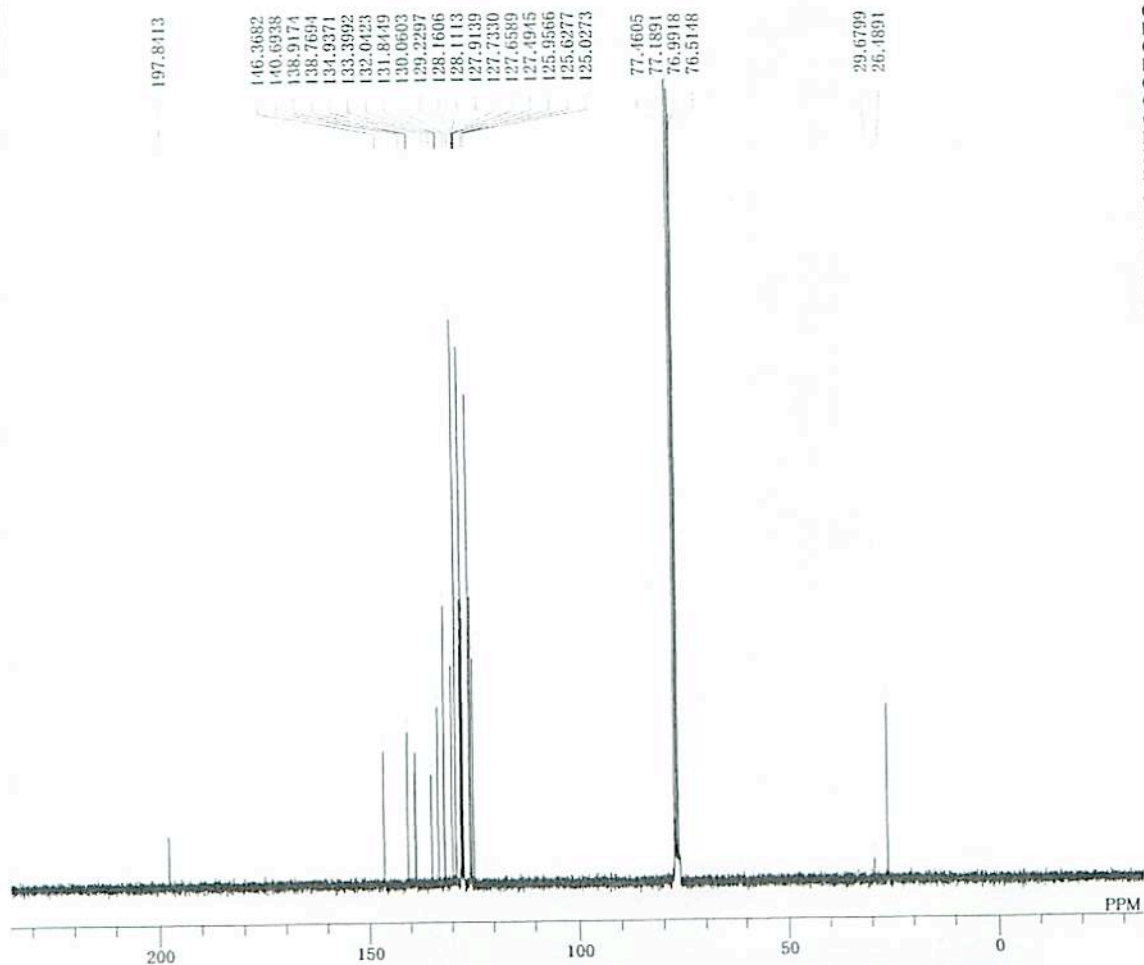

DEFAULTナフチル4アセトフ

|       |                  |
|-------|------------------|
| DFILE | DEFAULTナフチル4アセトフ |
| COMNT |                  |
| DATIM |                  |
| OBNUC |                  |
| EXMOD | 13C              |
| OBFRQ | BCM              |
| OBSET | 67.80 MHz        |
| OBFIN | 135.00 KHz       |
| POINT | 5200.00 Hz       |
| FREQU | 32768            |
| SCANS | 18306.64 Hz      |
| ACQTM | 11673            |
| PD    | 1.7900 sec       |
| PW1   | 1.2100 sec       |
| IRNUC | 3.50 usec        |
| CTEMP | 1H               |
| SLVNT | 16.7 c           |
| EXREF | CDCL3            |
| BF    | 77.00 ppm        |
| RGAIN | 0.12 Hz          |
|       | 27               |

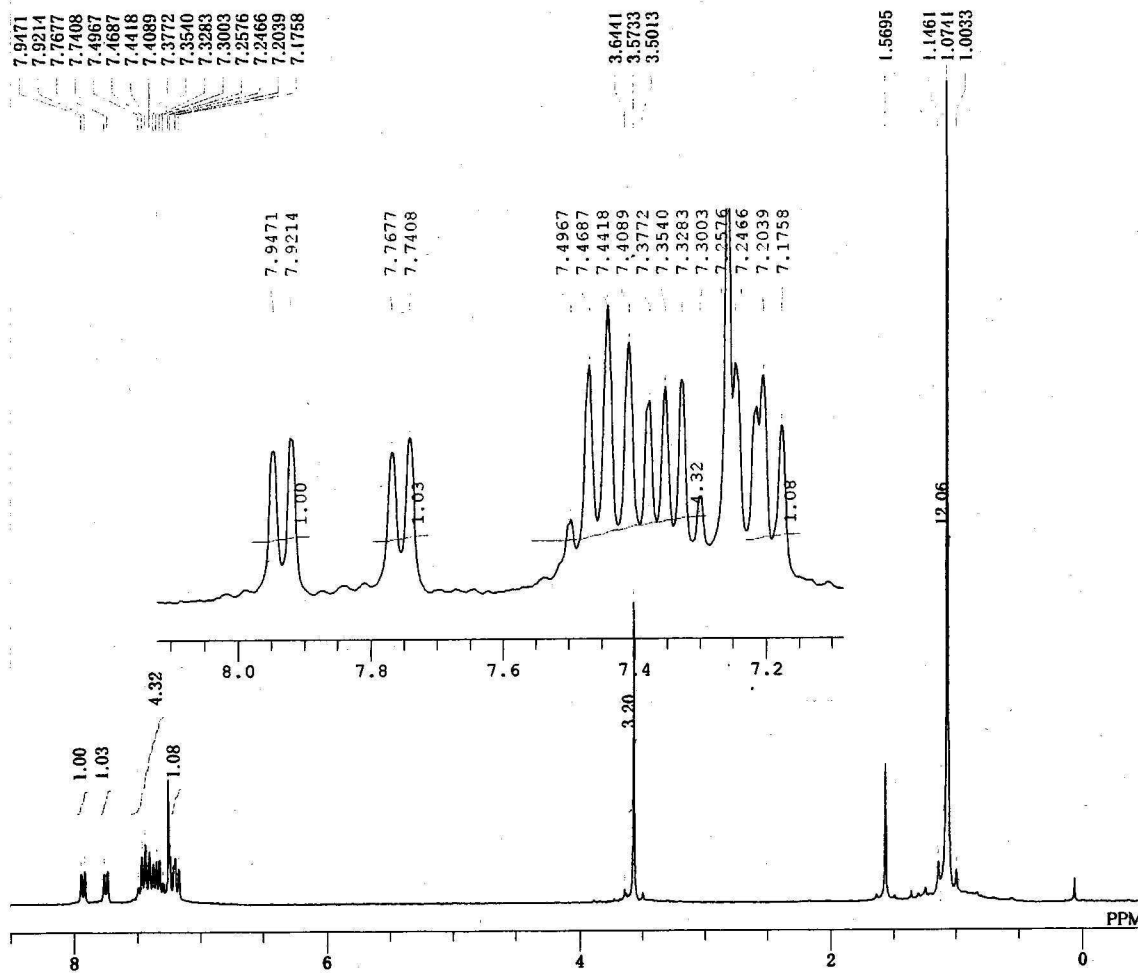

DFILE  
COMNT  
DATIM  
OBNUC  
EXMOD  
OBFRQ  
OBSET  
OBFIN  
POINT  
FREQU  
SCANS  
ACQTM  
PD  
PW1  
IRNUC  
CTEMP  
SLVNT  
EXREF  
BF  
RGAIN

DEFAULT.ALS  
Fri Nov 13 19:55:56 2009  
1H  
NON  
270.05 MHz  
112.00 KHz  
5800.00 Hz  
16384  
5401.76 Hz  
8  
3.0331 sec  
3.9670 sec  
5.40 usec  
1H  
CDCL3  
17.3 c  
7.26 ppm  
1.20 Hz  
22

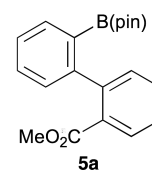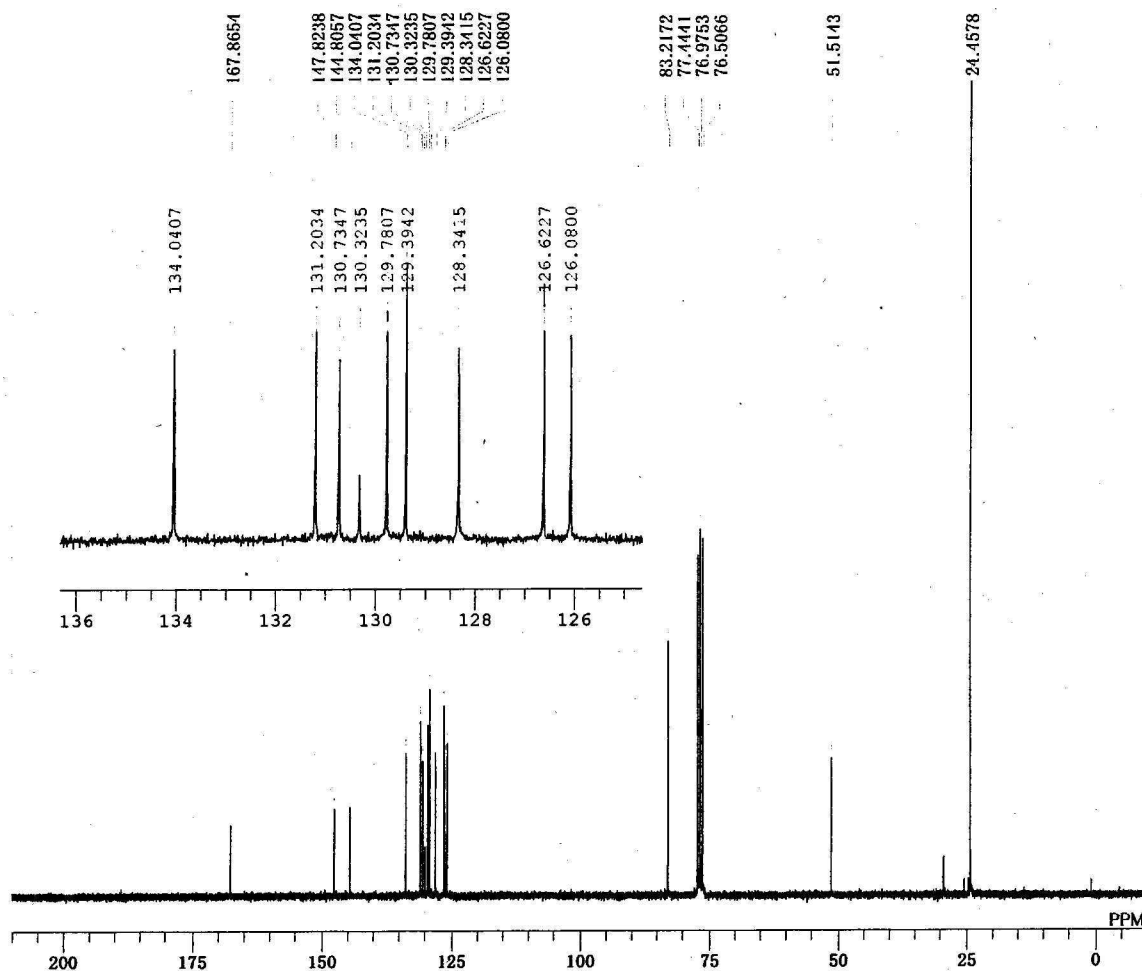

DFILE  
COMNT  
DATIM  
OBNUC  
EXMOD  
OBFRQ  
OBSET  
OBFIN  
POINT  
FREQU  
SCANS  
ACQTM  
PD  
PW1  
IRNUC  
CTEMP  
SLVNT  
EXREF  
BF  
RGAIN

29913C.als  
Tue Nov 17 08:49:41 2009  
13C  
BCM  
67.80 MHz  
135.00 KHz  
5200.00 Hz  
32768  
18306.64 Hz  
10946  
1.7900 sec  
1.2100 sec  
3.50 usec  
1H  
CDCL3  
19.7 c  
77.00 ppm  
0.12 Hz  
28



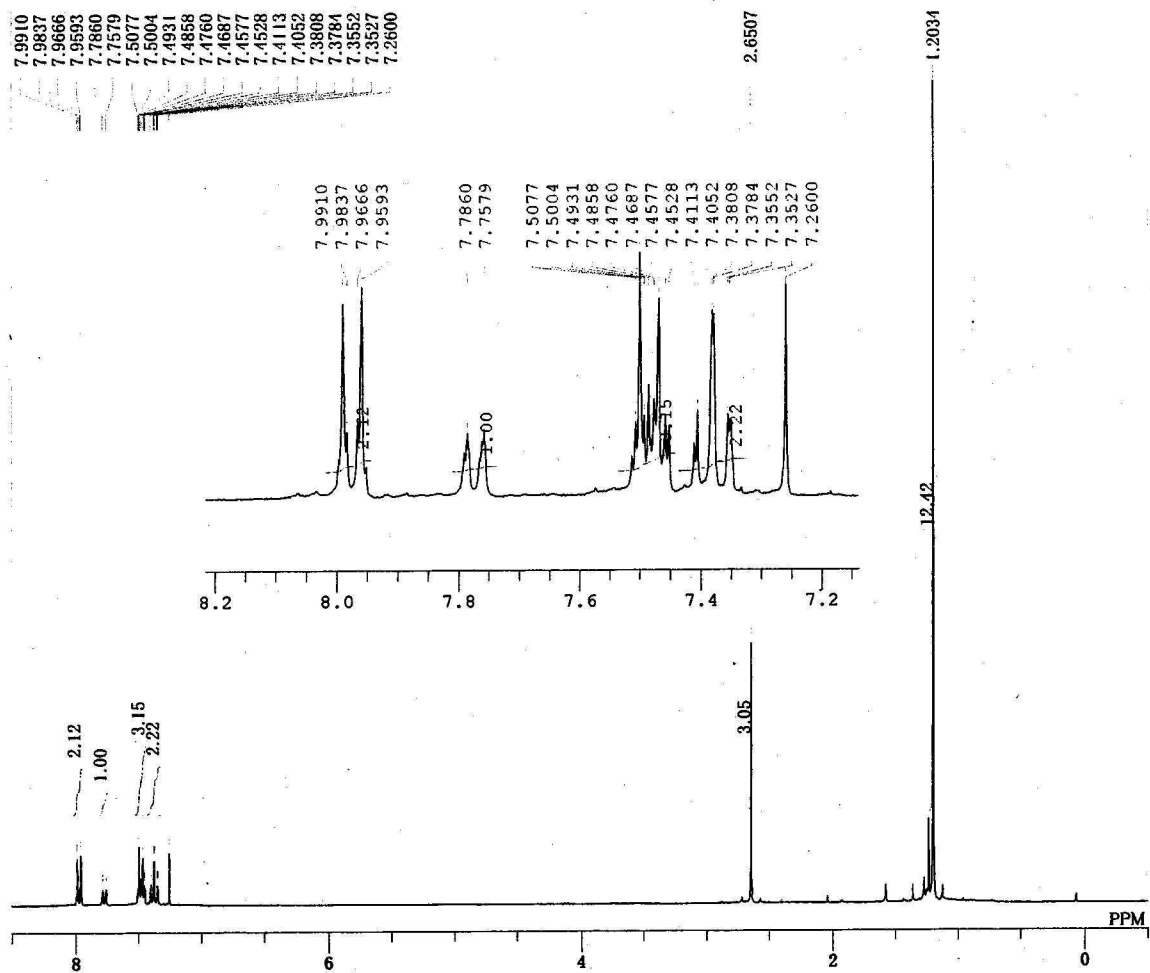

DFILE 295afterプレバラ.als  
 COMNT  
 DATIM Mon Nov 16 18:03:23 2009  
 OBNUC 1H  
 EXMOD NON  
 OBFRQ 270.05 MHz  
 OBSET 112.00 KHz  
 OBFIN 5800.00 Hz  
 POINT 16384  
 FREQU 5401.76 Hz  
 SCANS 8  
 ACQTM 3.0331 sec  
 PD 3.9670 sec  
 PW1 5.40 usec  
 IRNUC 1H  
 CTEMP 18.4 c  
 SLVNT CDCL3  
 EXREF 7.26 ppm  
 BF 0.12 Hz  
 RGAIN 20

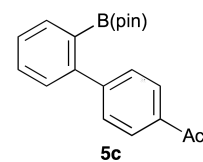

C:\FWinLambda\DATA\OhshitaYkawasima\29513C.als

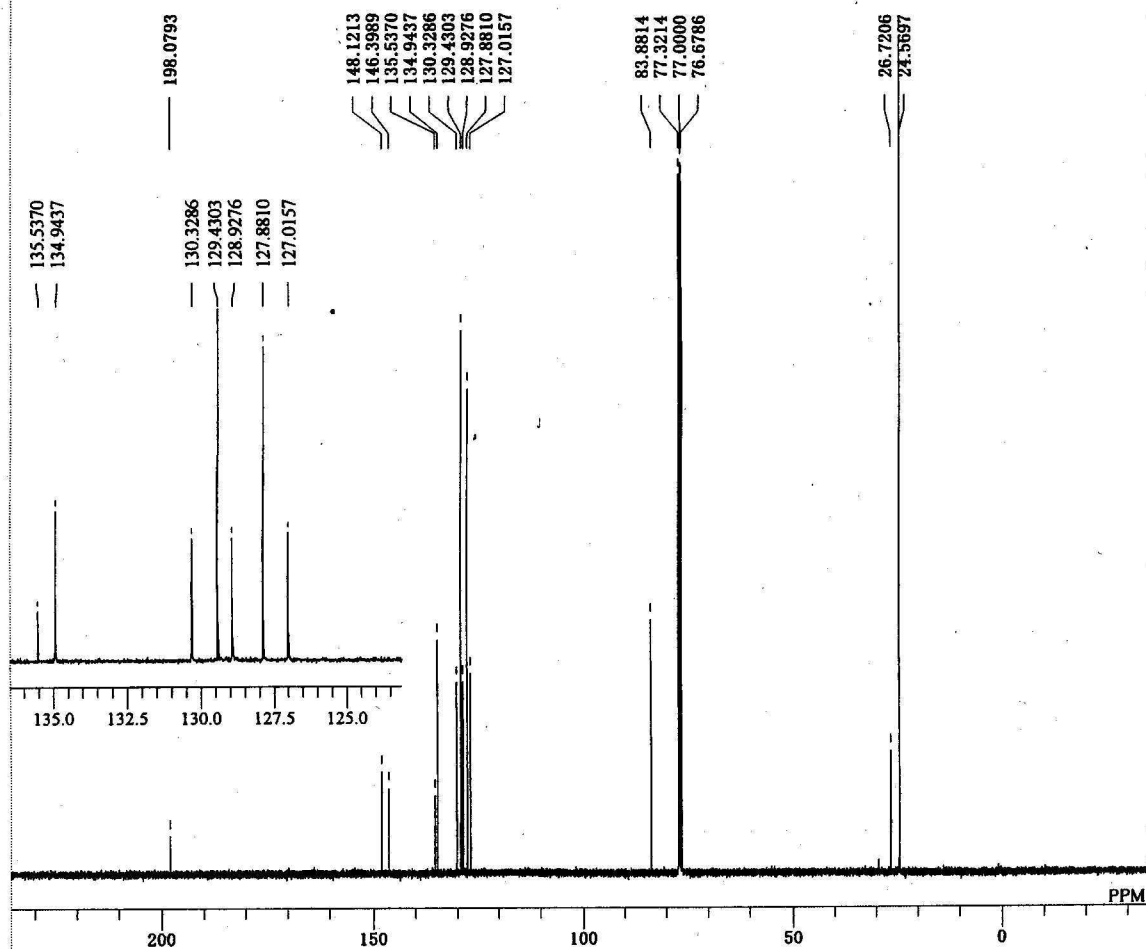

DFILE 29513C.als  
 COMNT  
 DATIM Tue Nov 17 08:53:17 2009  
 OBNUC 13C  
 EXMOD bcm  
 OBFRQ 99.45 MHz  
 OBSET 0.00 KHz  
 OBFIN 104750.00 Hz  
 POINT 32768  
 FREQU 26881.72 Hz  
 SCANS 12445  
 ACQTM 1.2190 sec  
 PD 1.7810 sec  
 PW1 4.25 usec  
 IRNUC 1H  
 CTEMP 21.7 c  
 SLVNT CDCL3  
 EXREF 77.00 ppm  
 BF 0.00 Hz  
 RGAIN 27
